# Supplementary material
Source: PubMed Central journal article supplement (PMC3738827)
Supplement: mmc1.pdf [file mmc1.pdf]

## Supplemental Data

### **ZMYND10 Is Mutated in Primary Ciliary Dyskinesia and Interacts with LRRC6**

Maimoona A. Zariwala, Heon Yung Gee, Malgorzata Kurkowiak, Dalal A. Al-Mutairi, Margaret W. Leigh, Toby W. Hurd, Rim Hjeij, Sharon D. Dell, Moumita Chaki, Gerard W. Dougherty, Mohamed Adan, Philip C. Spear, Julian Esteve-Rudd, Niki T. Loges, Margaret Rosenfeld, Katrina A. Diaz, Heike Olbrich, Whitney E. Wolf, Eamonn Sheridan, Trevor F.C. Batten, Jan Halbritter, Jonathan D. Porath, Stefan Kohl, Svjatlana Lovric, Daw-Yang Hwang, Jessica E. Pittman, Kimberlie A. Burns, Thomas W. Ferkol, Scott D. Sagel, Kenneth N. Olivier, Lucy C. Morgan, Claudius Werner, Johanna Raidt, Petra Pennekamp, Zhaoxia Sun, Weibin Zhou, Rannar Airik, Sivakumar Natarajan, Susan J. Allen, Israel Amirav, Dagmar Wieczorek, Kerstin Landwehr, Kim Nielsen, Nicolaus Schwerk, Jadranka Sertic, Gabriele Köhler, Joseph Washburn, Shawn Levy, Shuling Fan, Cordula Koerner-Rettberg, Serge Amselem, David S. Williams, Brian J. Mitchell, Iain A. Drummond, Edgar A. Otto, Heymut Omran, Michael R. Knowles, Friedhelm Hildebrandt

### Supplemental Acknowledgments

We are indebted to other investigators and the coordinators of the “Genetic Disorders of Mucociliary Clearance Consortium” that is part of the Rare Disease Clinical Research Network (URL: <http://rarediseasesnetwork.epi.usf.edu/gdmcc/index.htm>), including Drs. Stephanie Davis, Johnny Carson, Milan Hazucha, Peadar Noone, Ms. Susan Minnix and Ms. Caroline LaFave (University of North Carolina at Chapel Hill, NC), Dr. Jeffrey Atkinson and Ms. Jane Quante (Washington University, St. Louis, Mo) and Ms. Shelley Mann (The Children’s Hospital, Aurora, Co), Ms. Andrea Henkel (National Institute of Allergy and Infectious Diseases, Bethesda, MD), Dr. Carlo Milla and Ms. Jacquelyn Zirbes (Stanford University Medical Center, Palo Alto, CA), Ms. Sharon McNamara (Children’s Hospital and Regional Medical Center, Seattle, WA), Ms. Melody Miki (The Hospital for Sick Children, Toronto, Ontario, Canada). The authors also thank Ms. Lu Huang for technical assistance; and Ms. Elizabeth Godwin, for administrative support. We thank Dr. Herbert-Joachim Boenisch and Dr. Dagmar Schütte (Städtisches Klinikum-Klinik für Kinder-und Jugendmedizin Braunschweig), Dr. Johannes Wildhaber (Universitäts Kinderklinik Zürich), and Drs. Soliman Alkrinawi and Micha Aviram (Soroka University Medical Center, Beer Sheva, Israel). In addition, this publication was made possible by grants from ORDR, NHLBI and NCATS, components of National Institute of Health (NIH). Its contents are solely the responsibility of the authors and do not necessarily represent the official view of NCRR or NIH. Z.S. is supported by core A (1P30DK090744-01) and ACS (RSG-10-247-01-DDC). F.H. is an Investigator of the Howard Hughes Medical Institute and a Doris Duke Distinguished Clinical Scientist. K.N.O. is supported by the Intramural Research Program of the National Institute of Allergy and Infectious Diseases, NIH.

(A) A4197 (#8) *DNAH5* [c.1090-6A>G, splice (het); p.Phe2077Ser (het)]

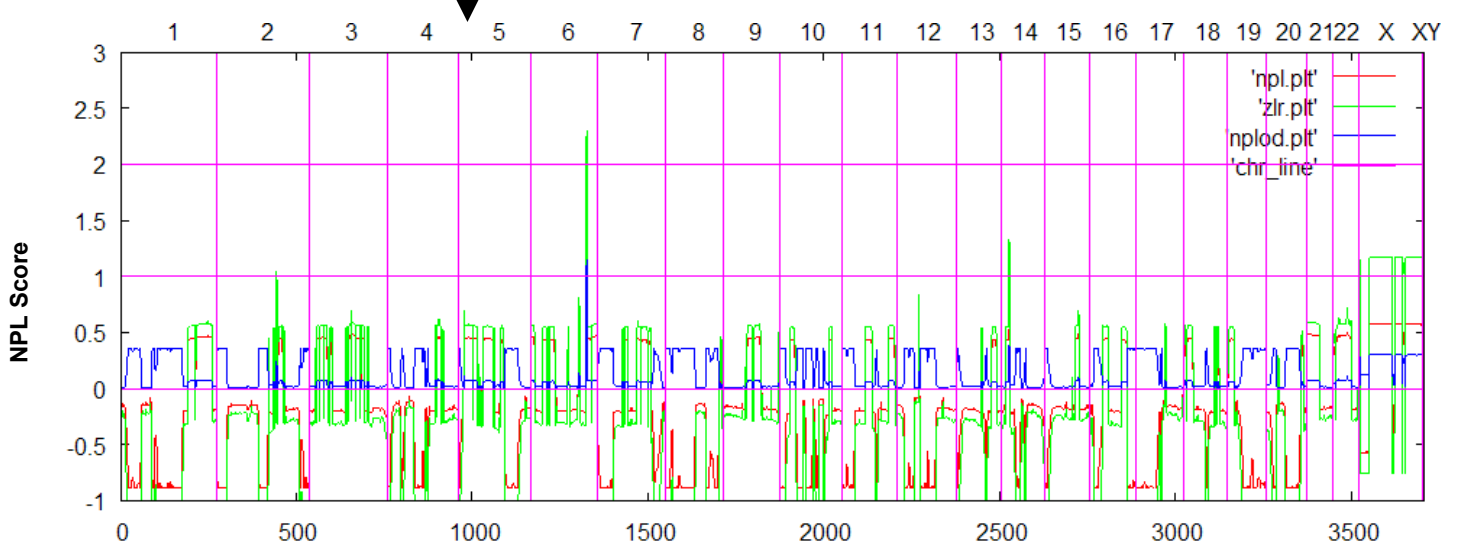

(B) A4233 (#647) *DNAH5* [p.Arg1995\* (het); p.Arg2833His (het)]

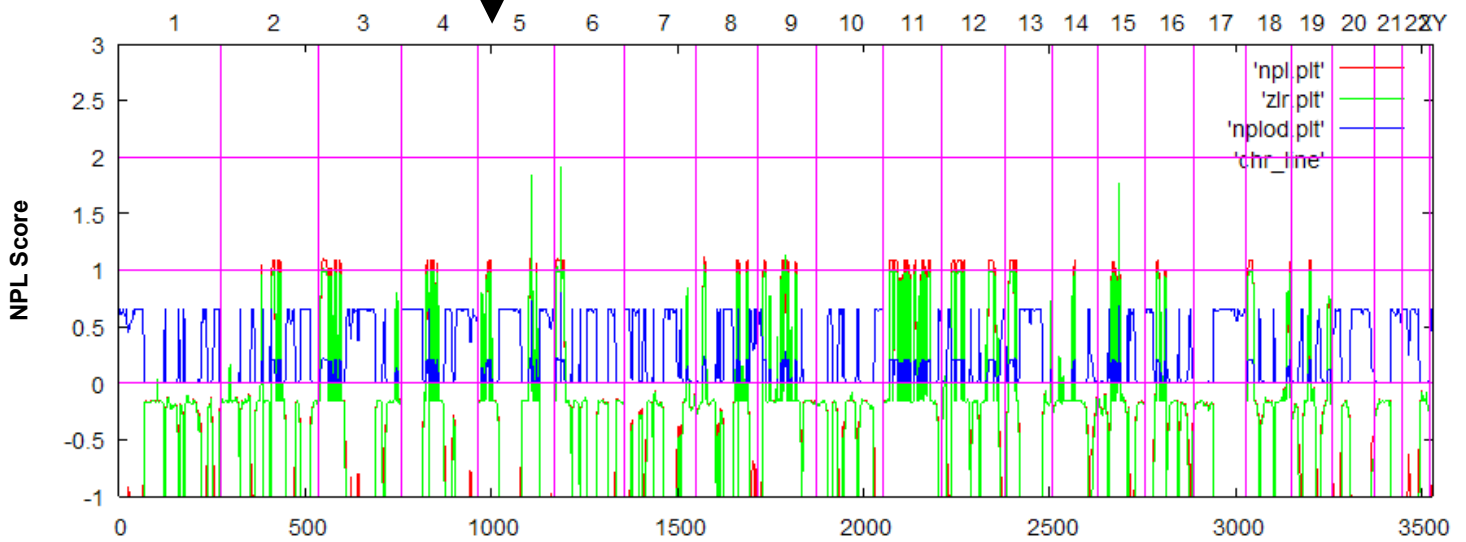

(C) A4201 (#20) *DNAH5* [p.Gln3462\* (het); p.Met2083Ile, splice (het)]

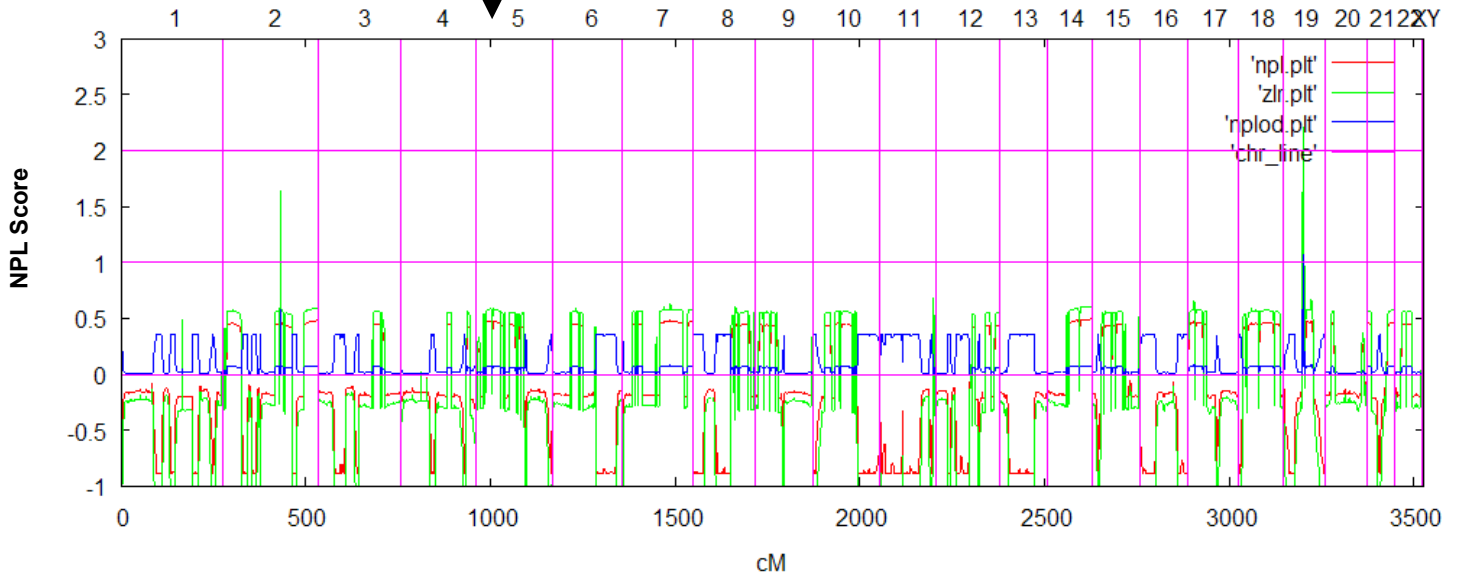

(D) A4207 (#100)

*DNAH5* [p.Lys3143\* (het); p.Arg3539Cys (het)]

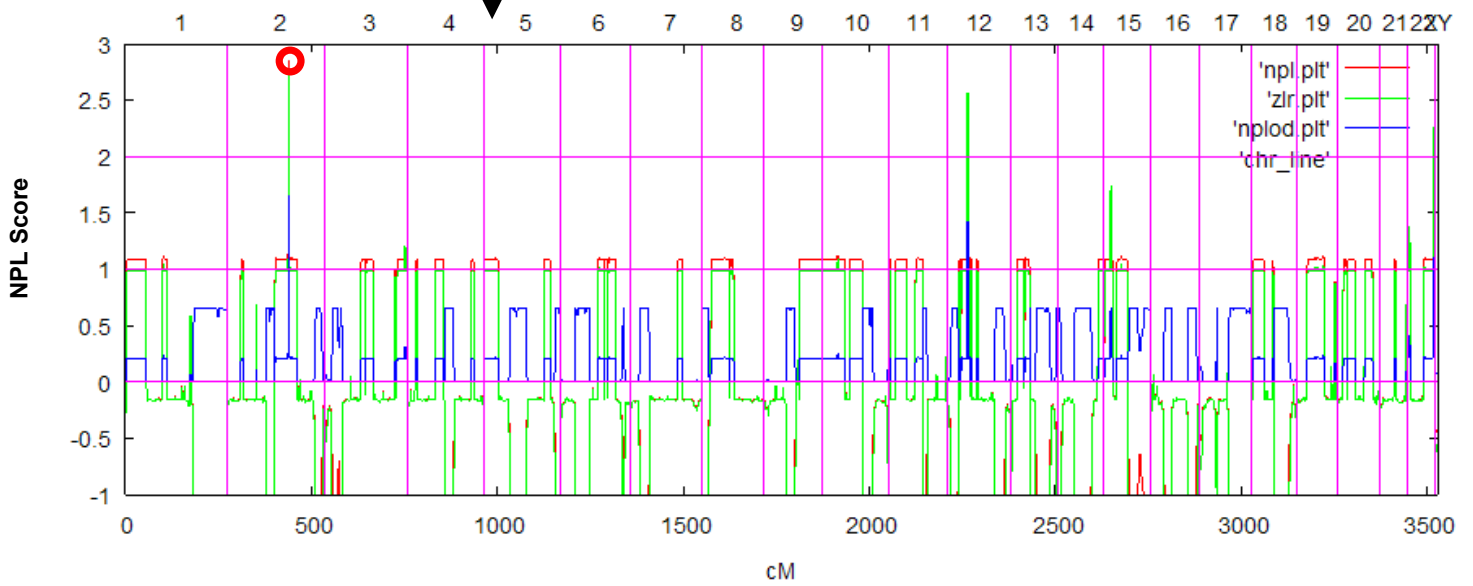

(E) A4200 (#11)

*DNAH5* [p.Gln3462\* (Hom)]

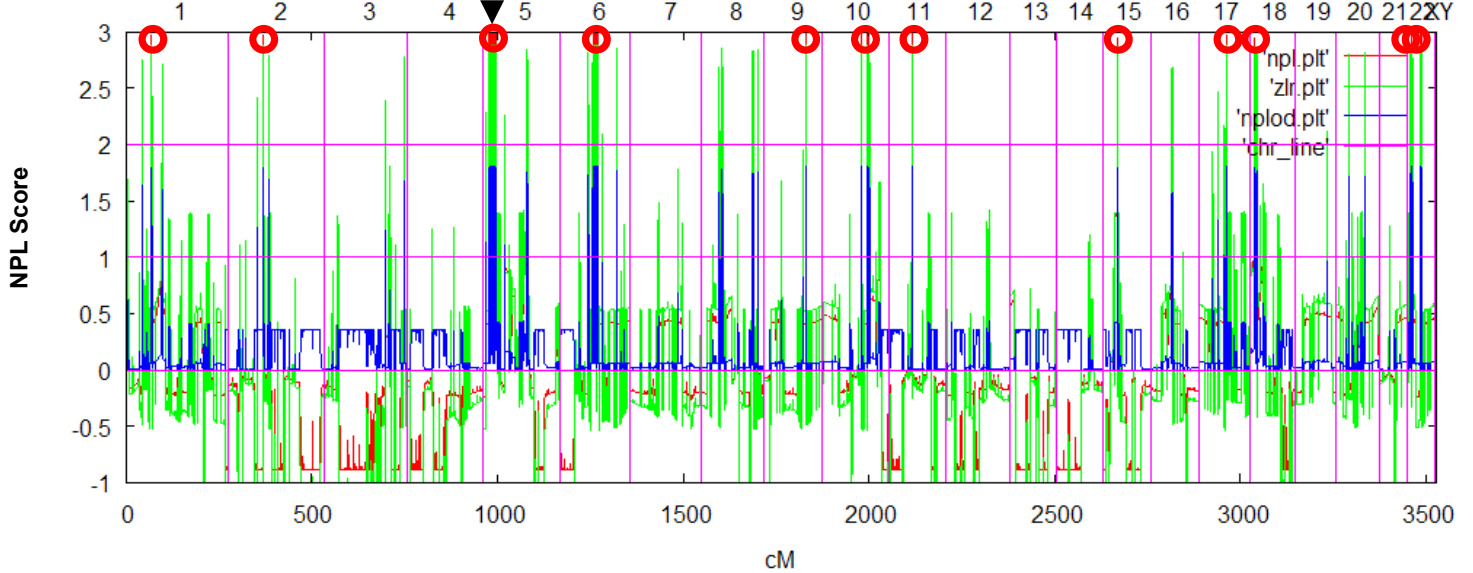

(F) A4293 (#1)

*CCDC39* [c.610-2A>G, splice (het); p.Thr277Argfs\*3 (het)]

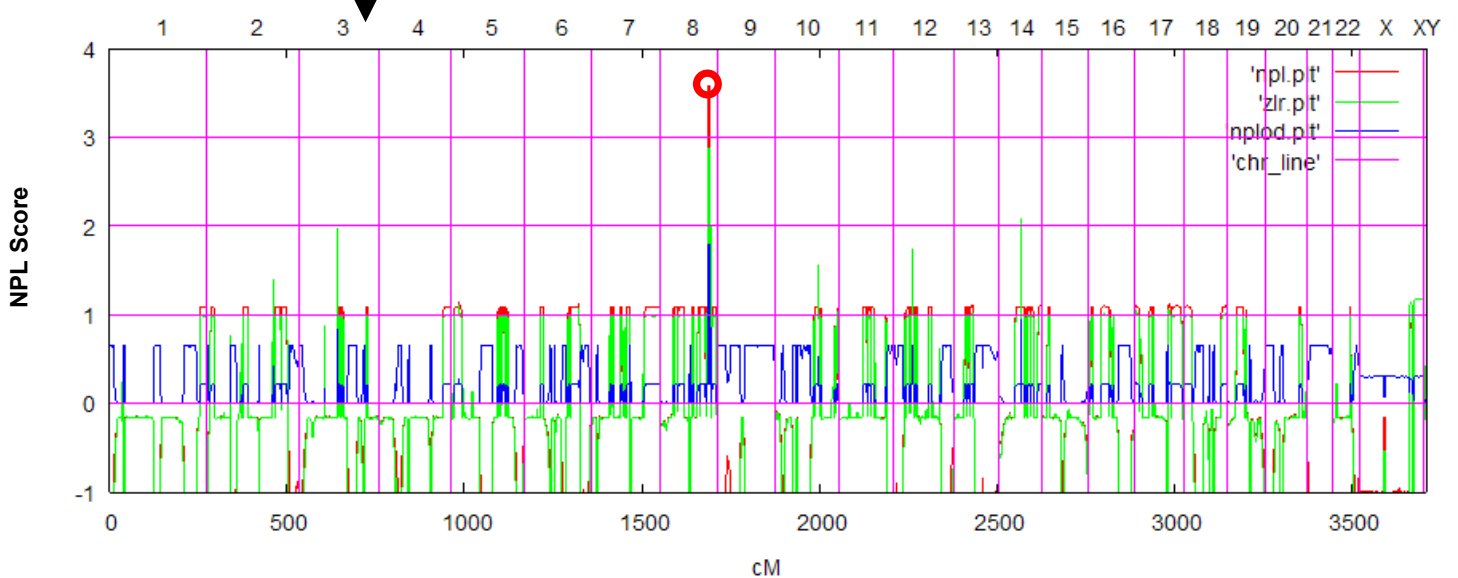

(G) A4195 (#2) **CCDC39** [p.Phe514Glnfs\*5 (het); c.1528-43A>G, splice (het)]

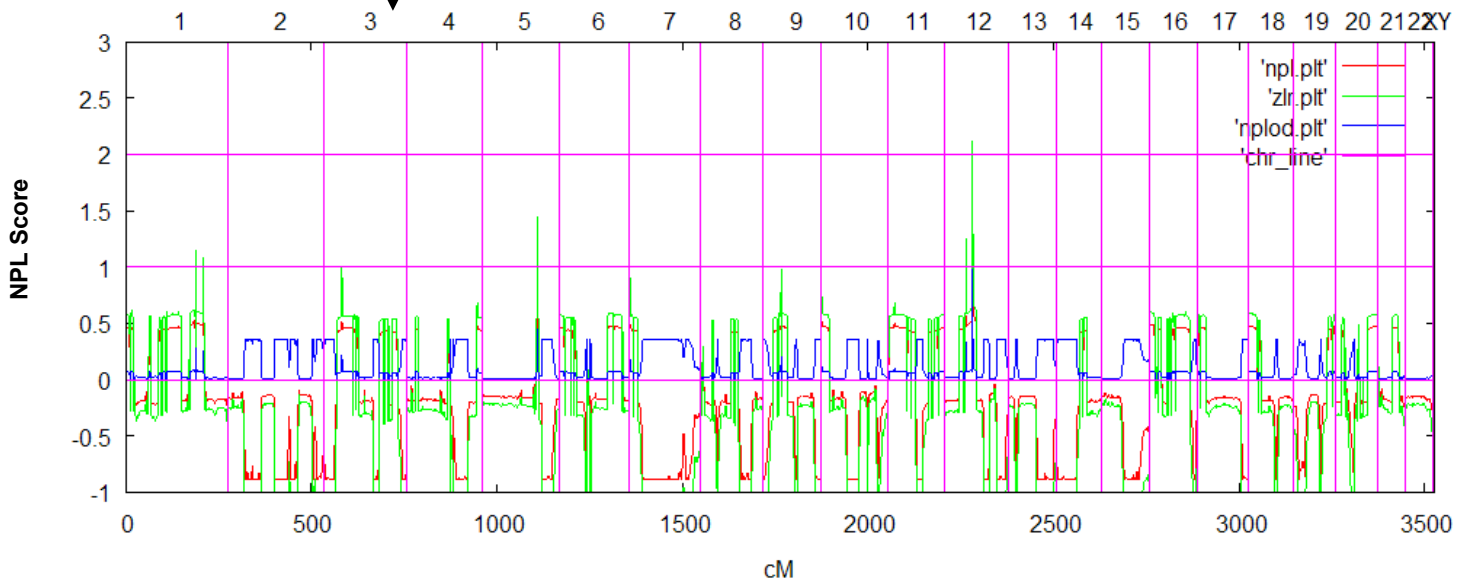

(H) A4199 (#10) **CCDC39** [p.Glu597\* (het); p.Gln833Valfs\*6 (het)]

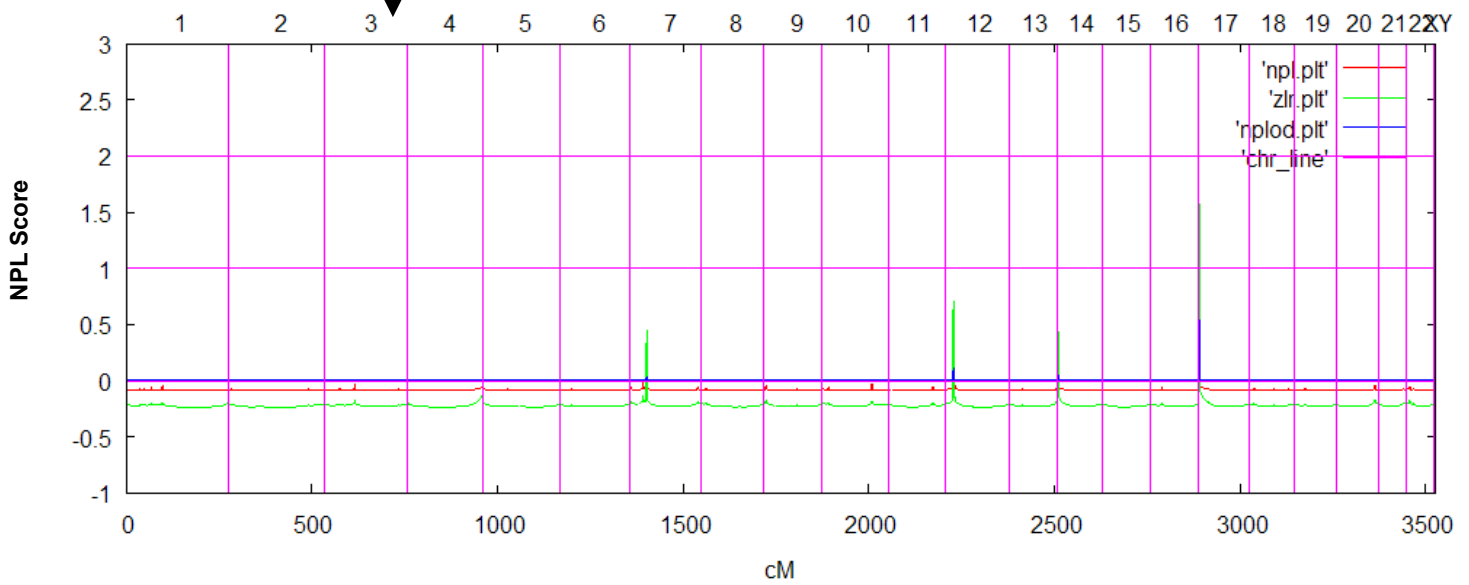

(I) A4220 (#337)

**CCDC40** [p.Ala83Valfs\*84 (hom)]

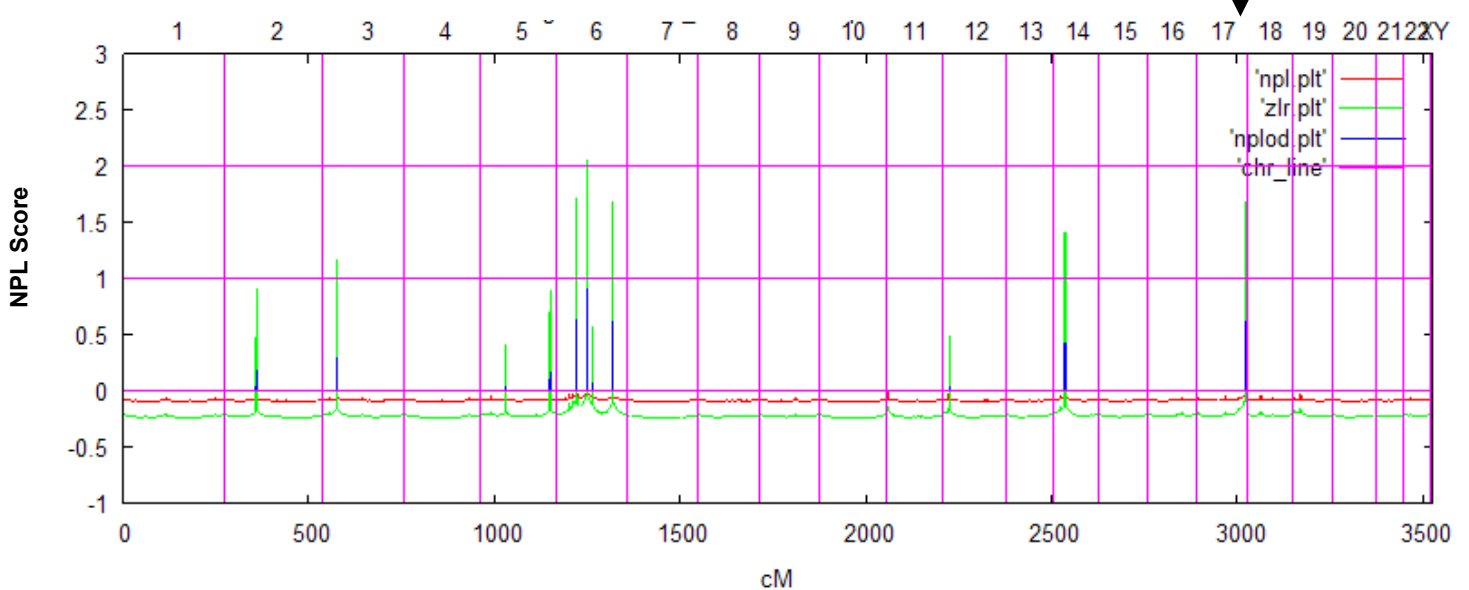

(J) A4216 (#250)

**CCDC40** [p.Ile473Phefs\*2 (hom)]

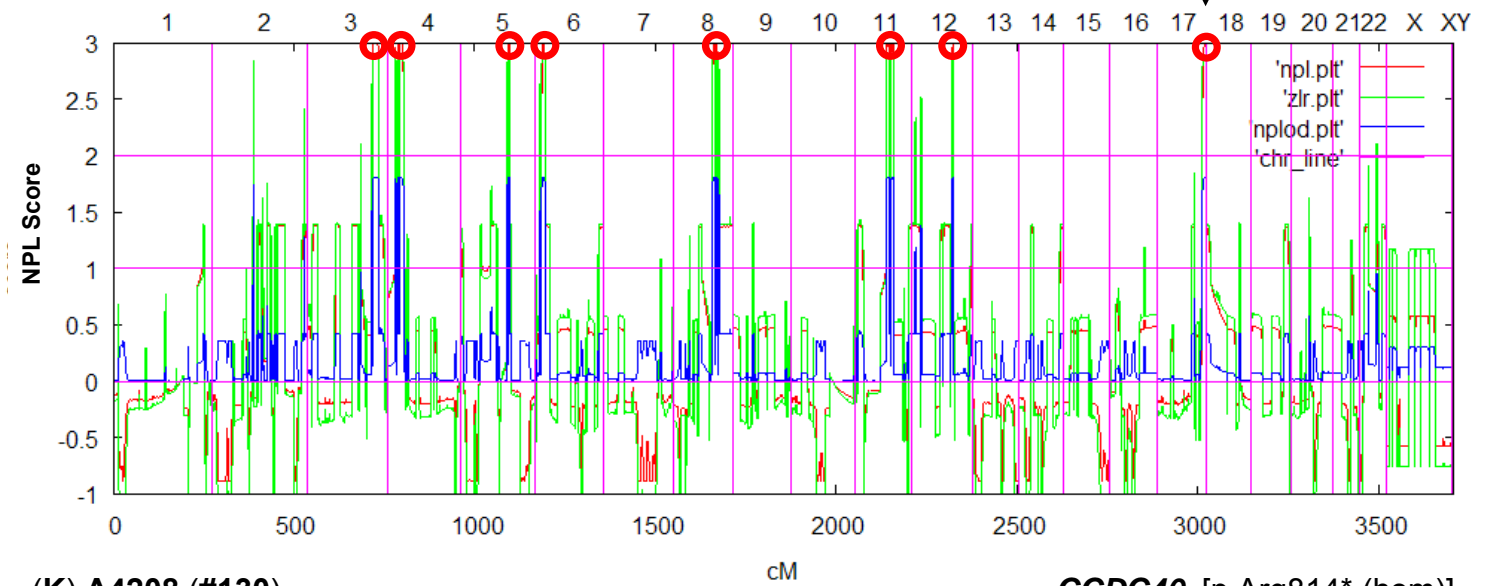

(K) A4208 (#130)

**CCDC40** [p.Arg814\* (hom)]

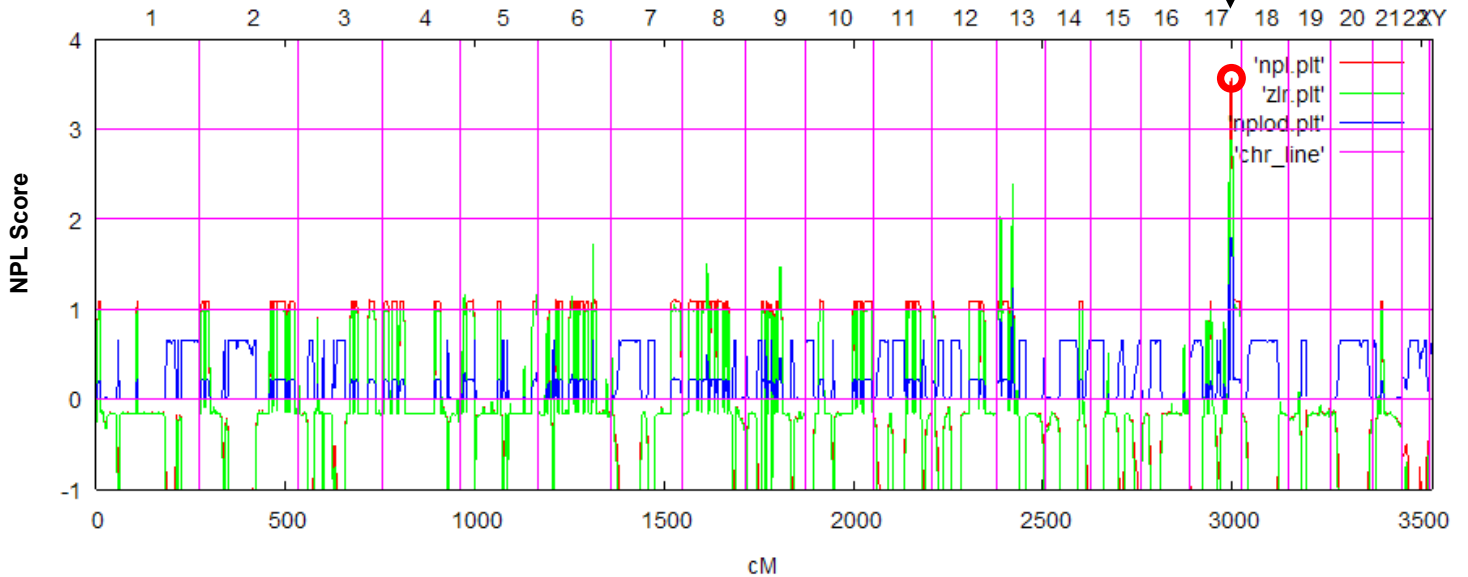

(L) A4224 (#394/527)

**DNAH11** [p.Gln831\* (het);p.Ala1291Thr (het)]

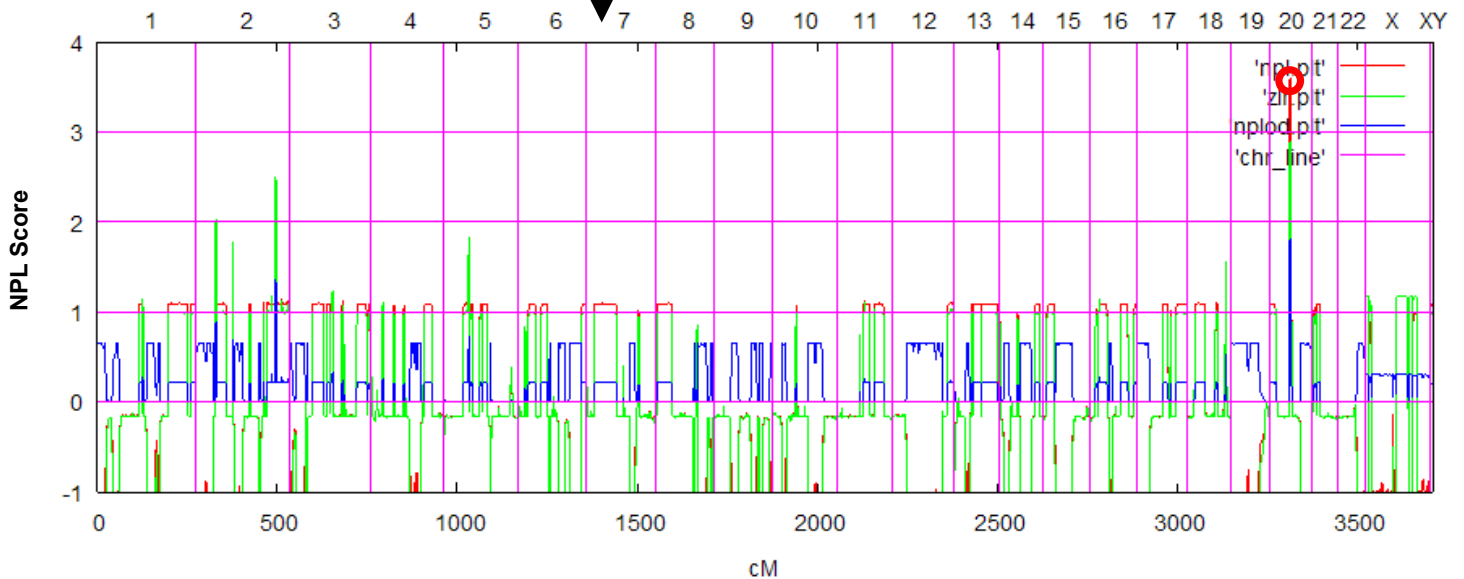

(M) A4230 (#560)

*DNAH11* [p.Arg1485\* (het);p.Arg2907\* (het)]

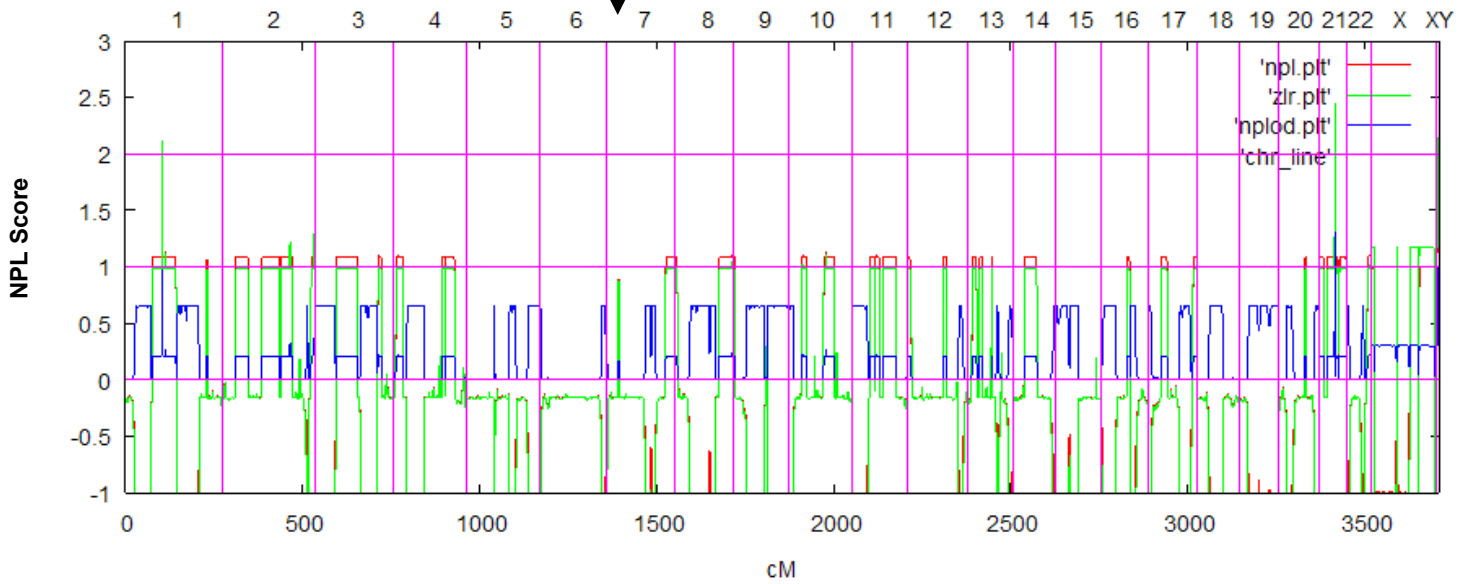

(N) A4218 (#268)

*DNAI2* [p.Trp435\* (het); p.Glu453Glyfs\*40 (het)]

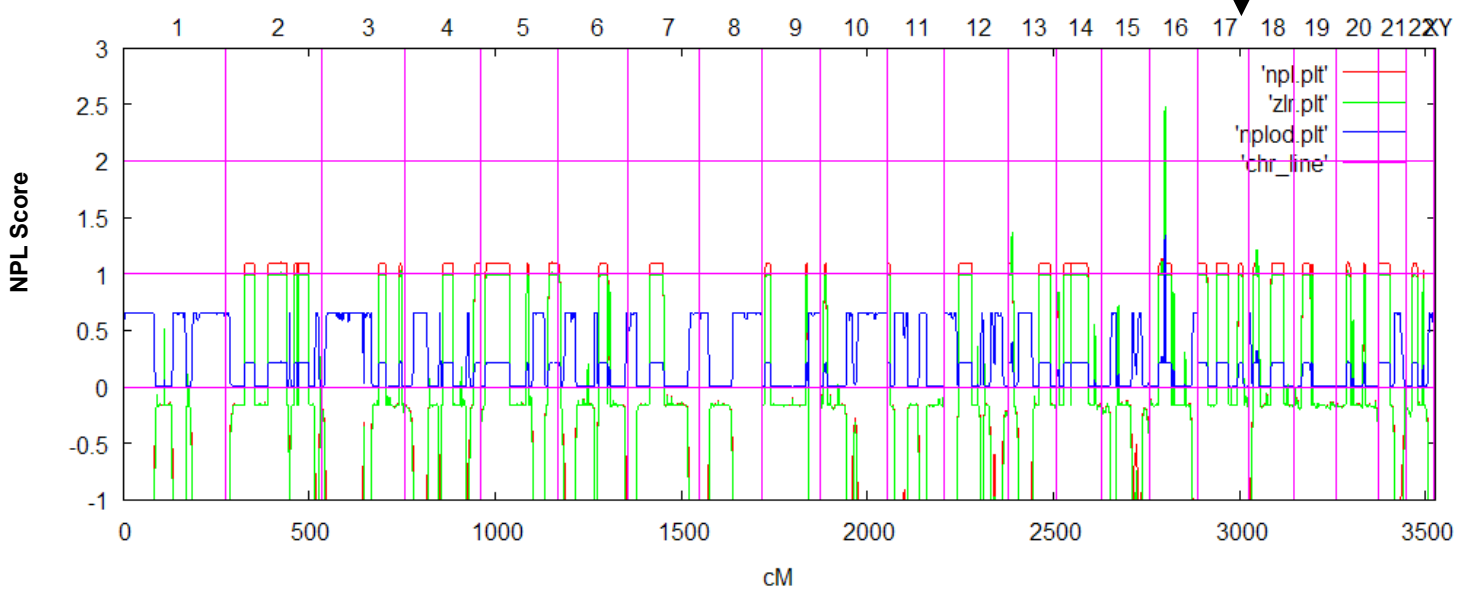

(O) A4217 (#264)

*CCDC103* [p.His154Pro (hom)]

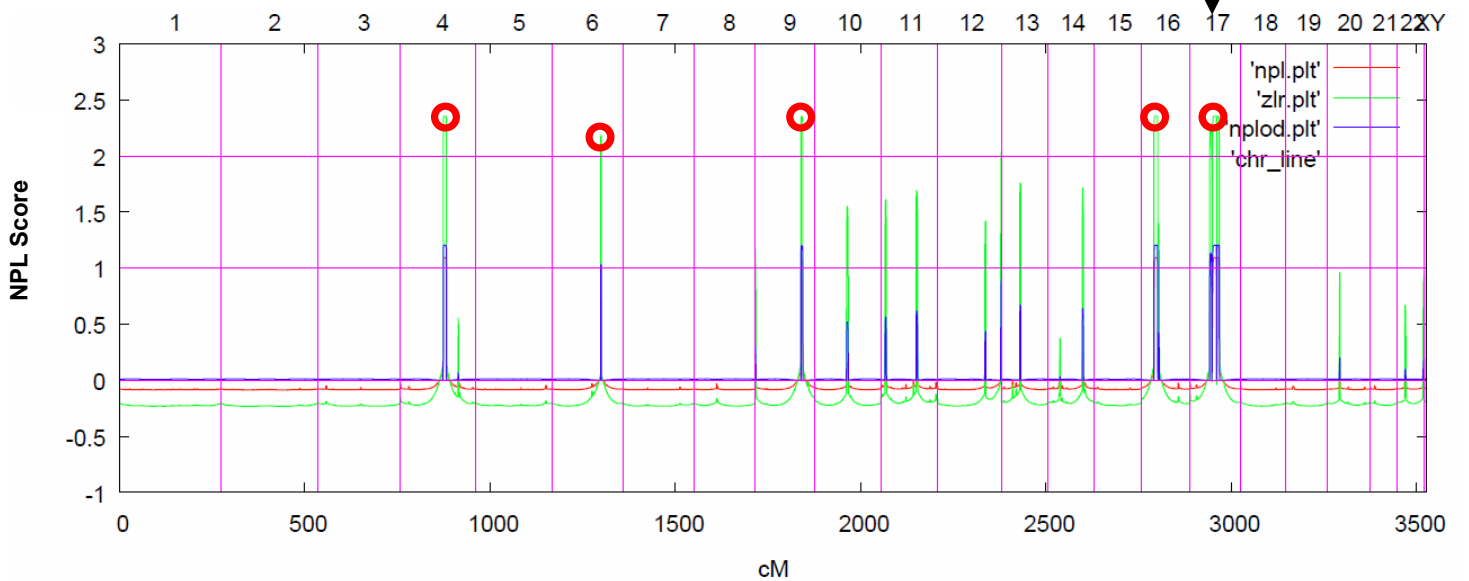

(P) A4228 (#530/1674)

*DNAH5* [p.Gln1413\* (het)]

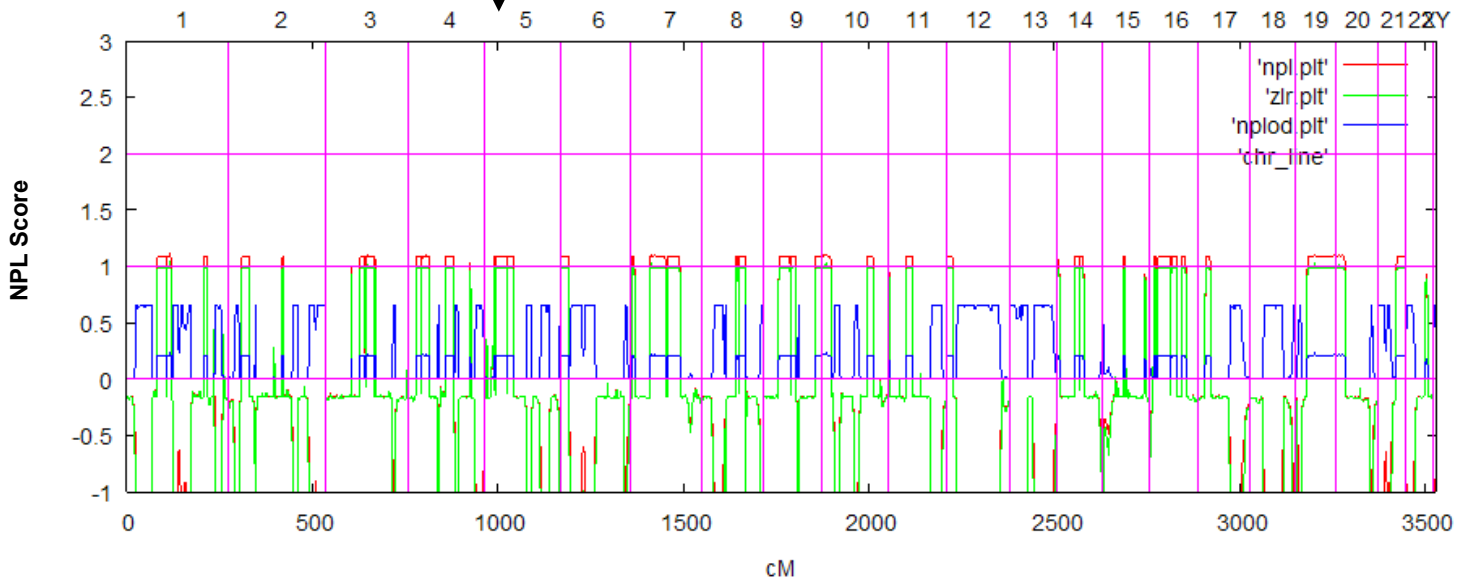

(Q) A4198 (#9)

*DNAH5* [p.Arg1883\* (het)]

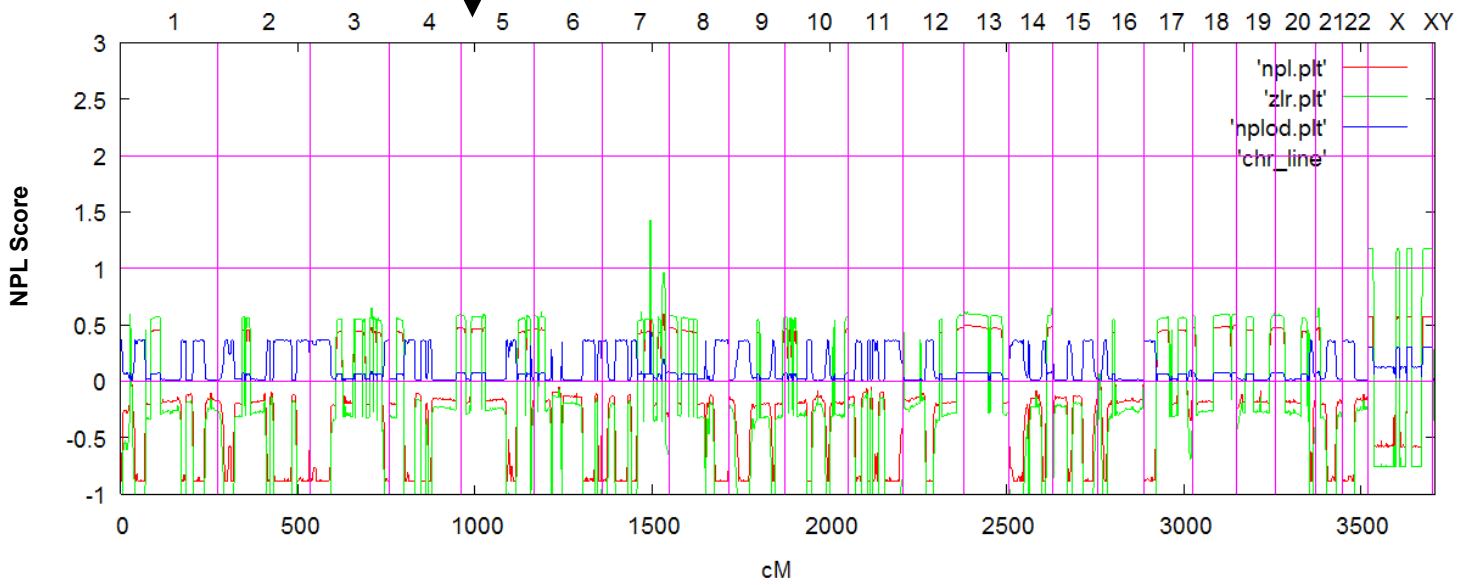

(R) A4221 (#348)

*DNAH5* [c.8449-2A>G, splice (het)]

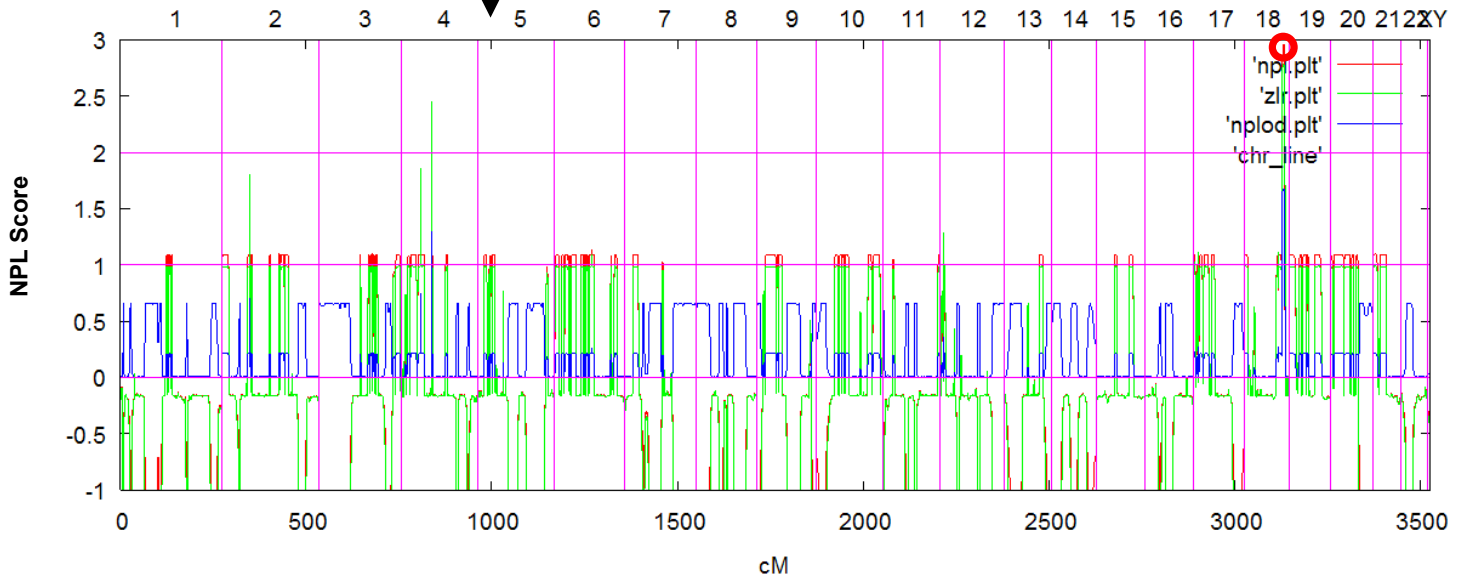

(S) A4213 (#232)

**LRRC6**

[p.Trp210Cysfs\*12 (hom)]

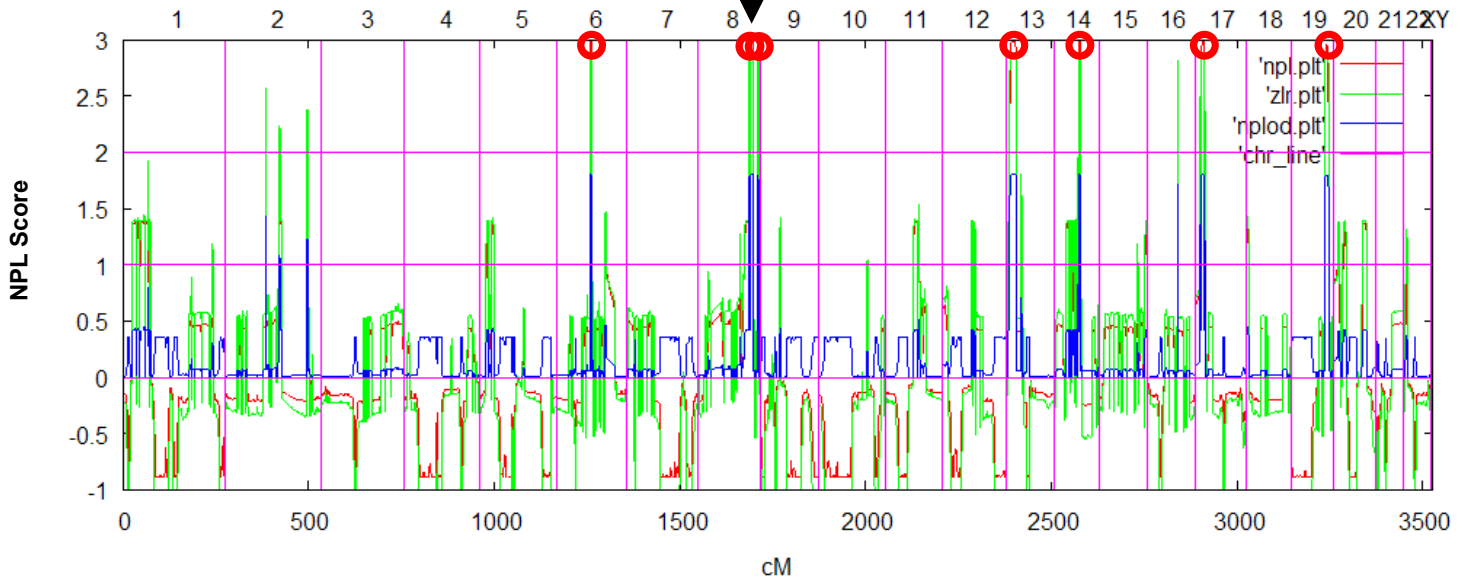

(T) A4231 (#568)

**ZMYND10**

[p.Tyr379Cys (hom)]

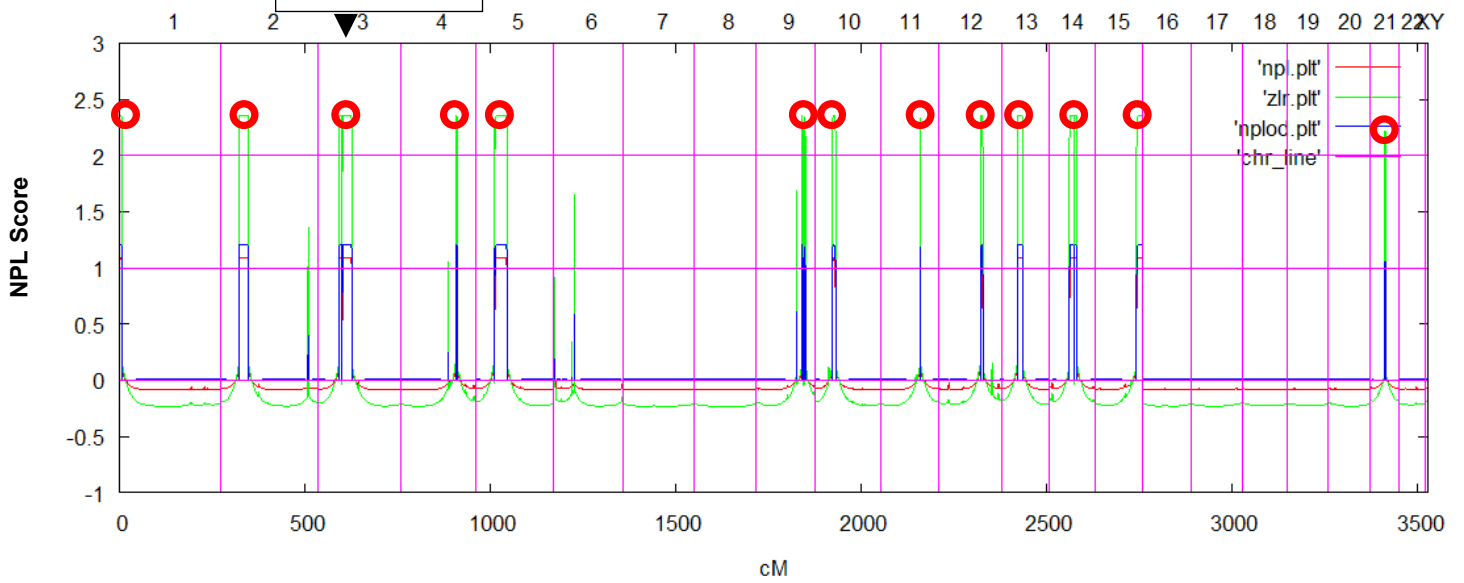

(U) A4225 (#400)

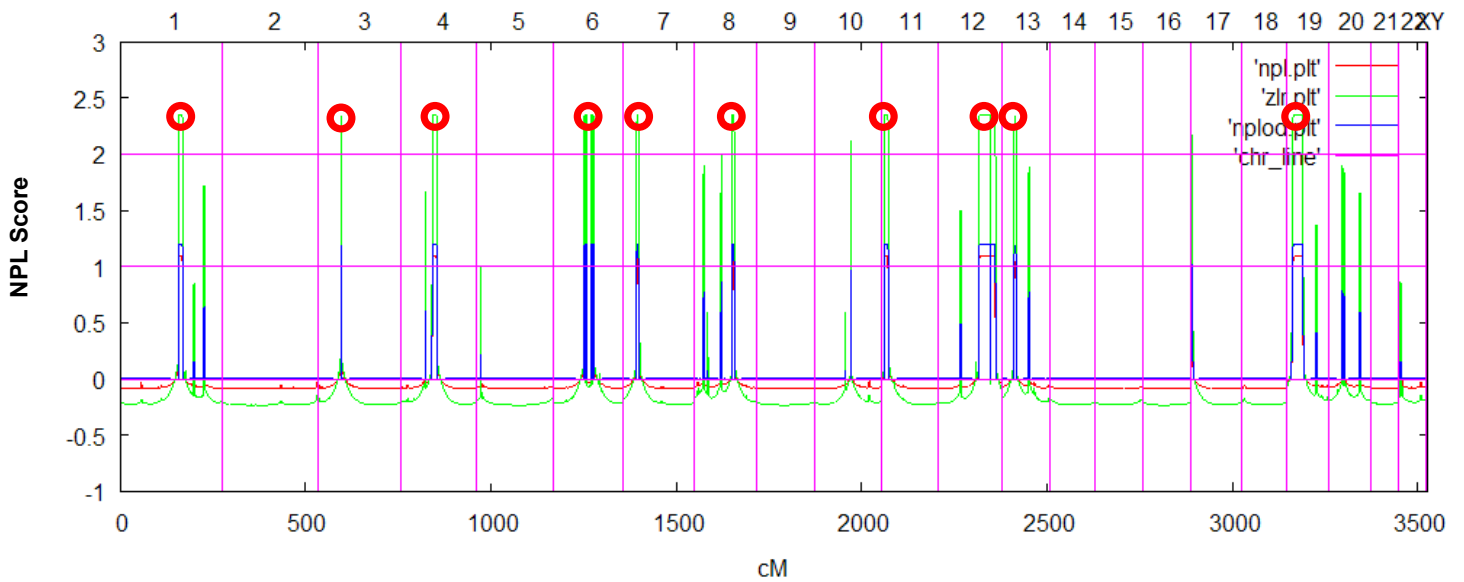



(V) A4214 (#233)

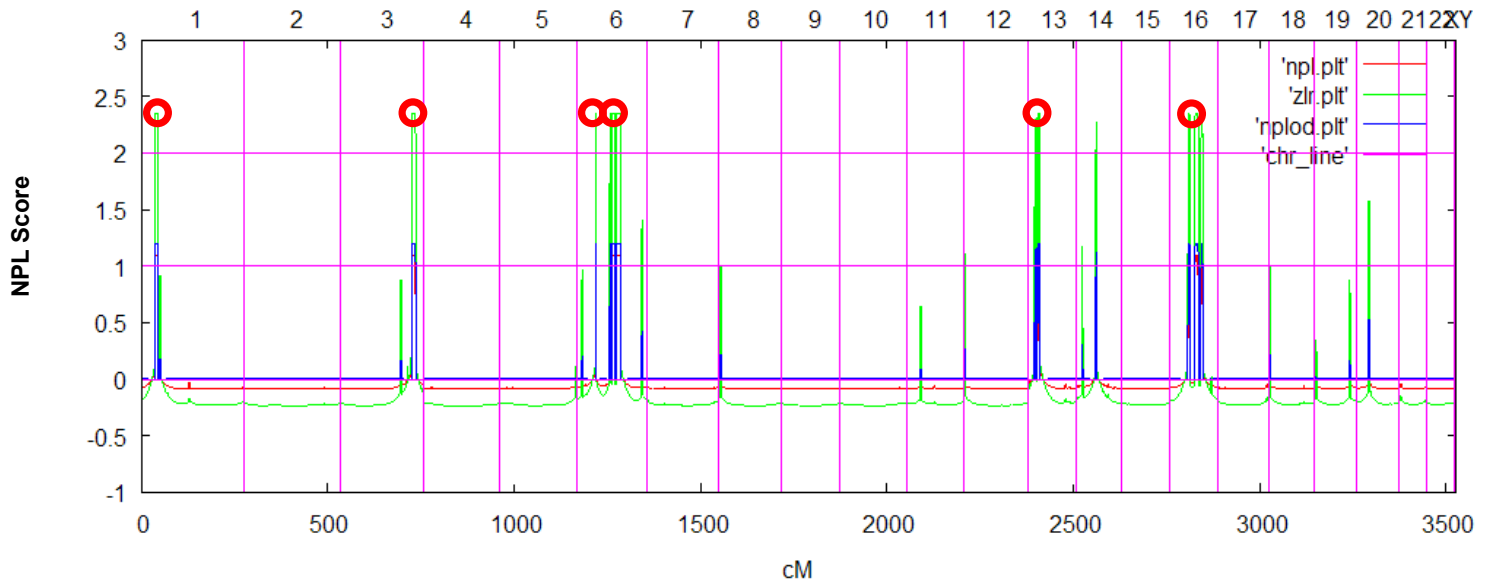

(W) A4211 (#160)

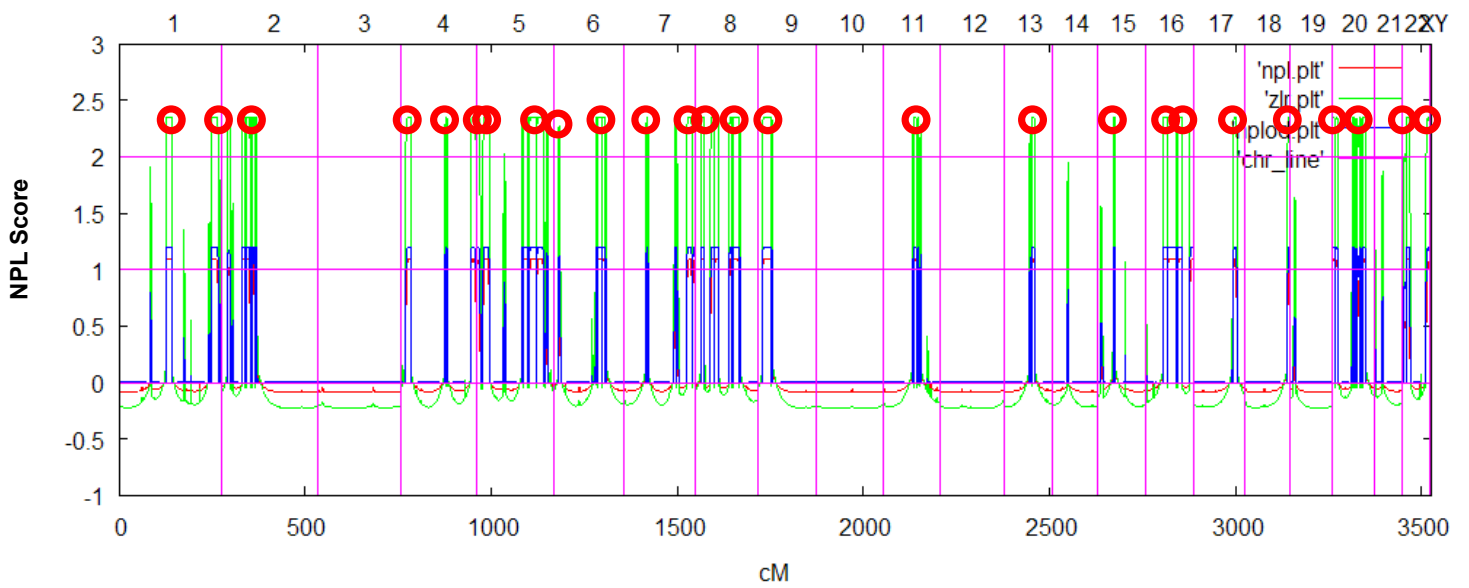

(X) A4209 (#131)

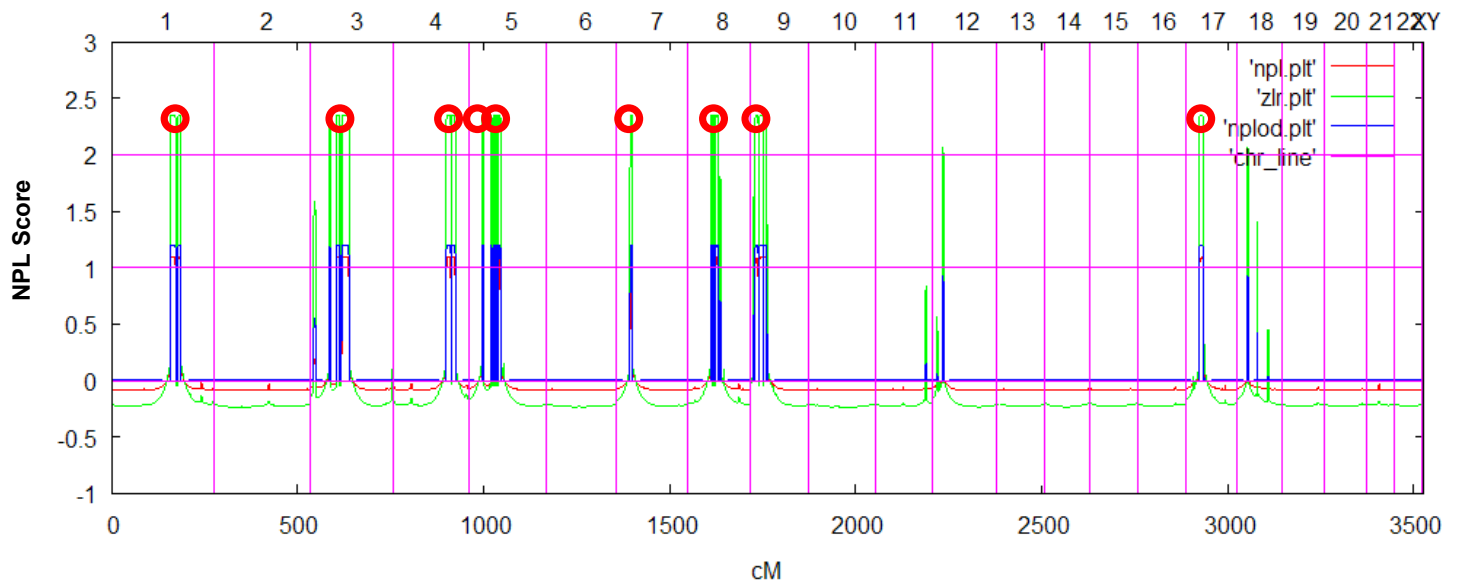

**(Y) A4206 (#66)**

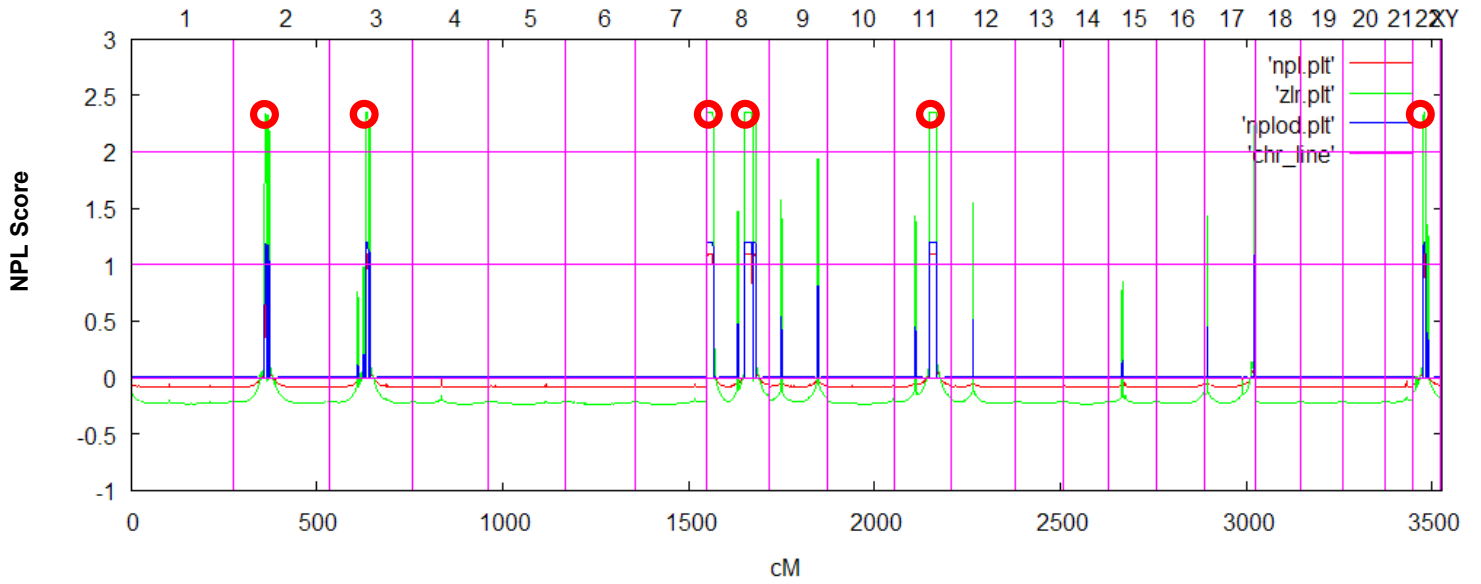

**(Z) A4219 (#287)**

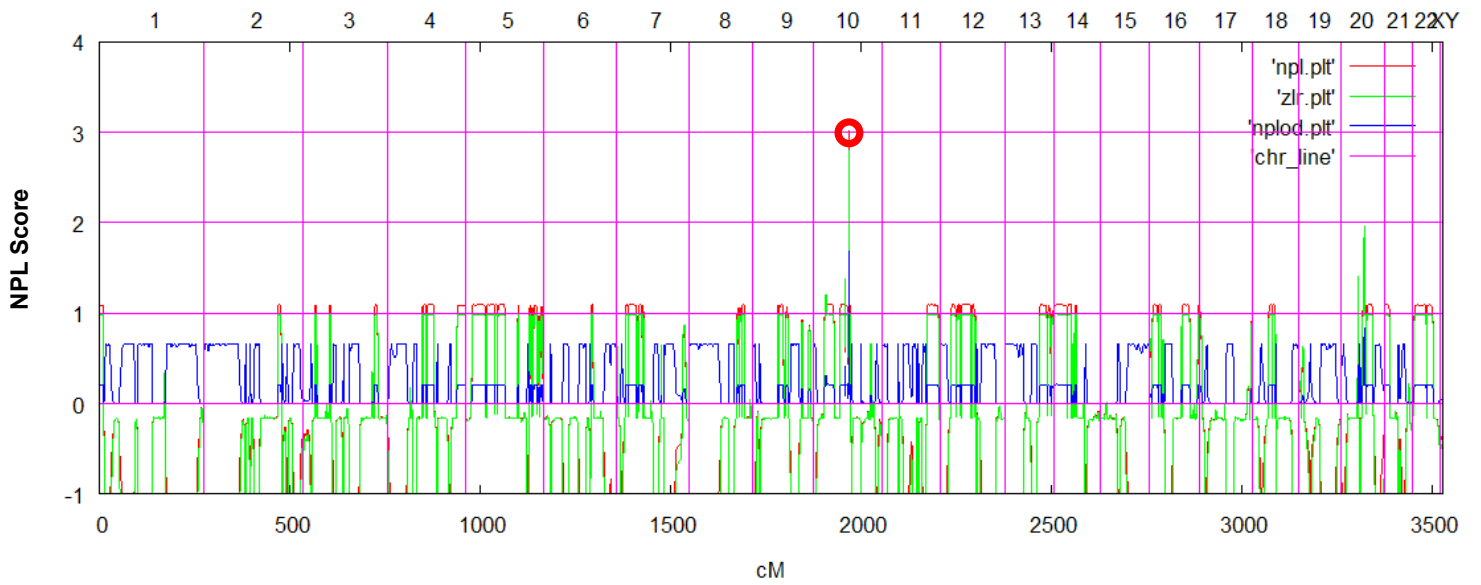

**(Z1) A4294 (#22)**

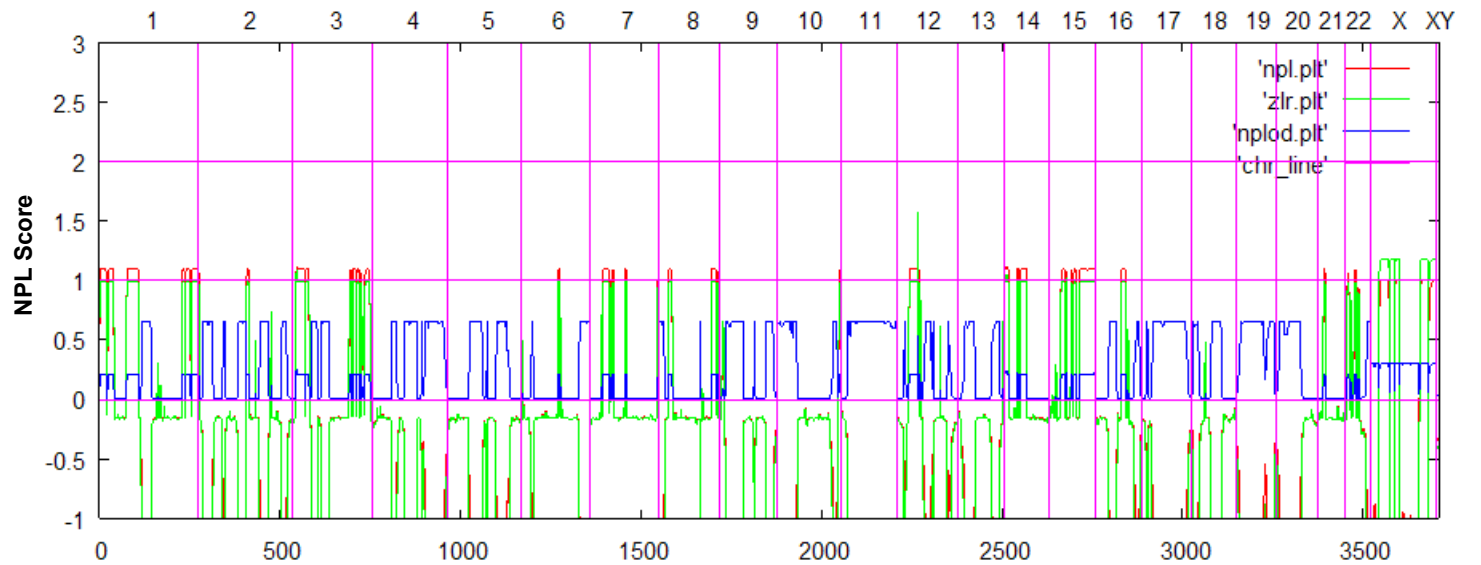

**(Z2) A4203 (#28)**

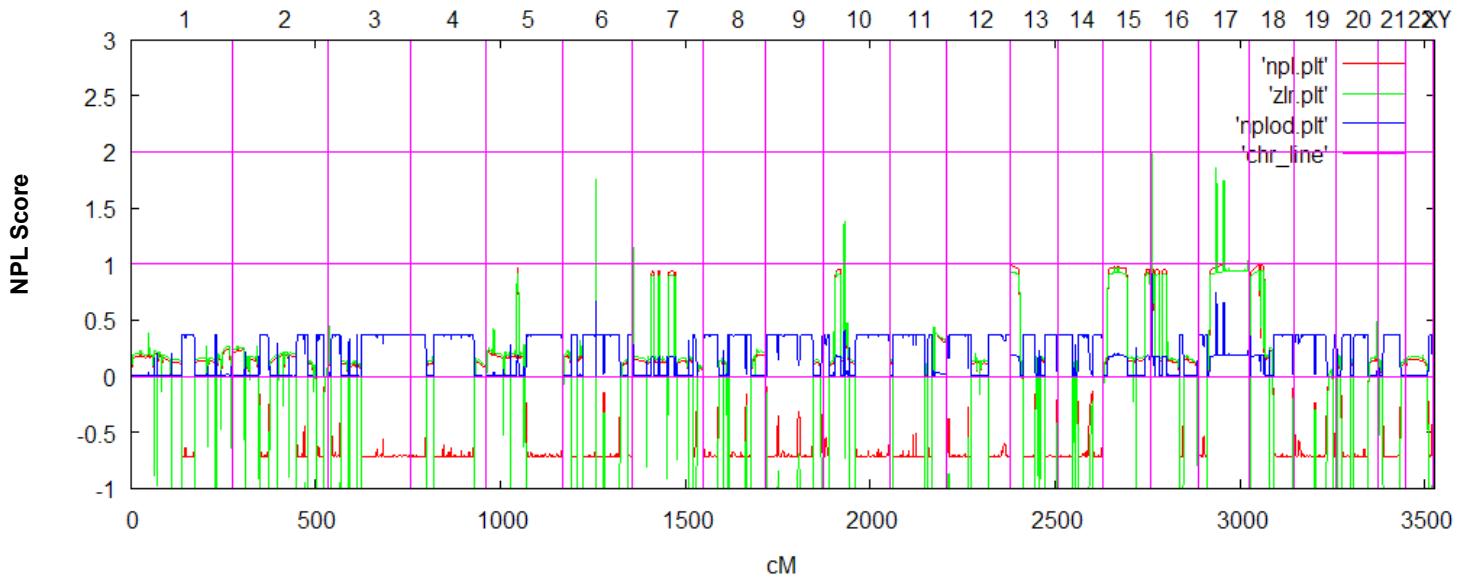

**(Z3) A4226 (#495)**

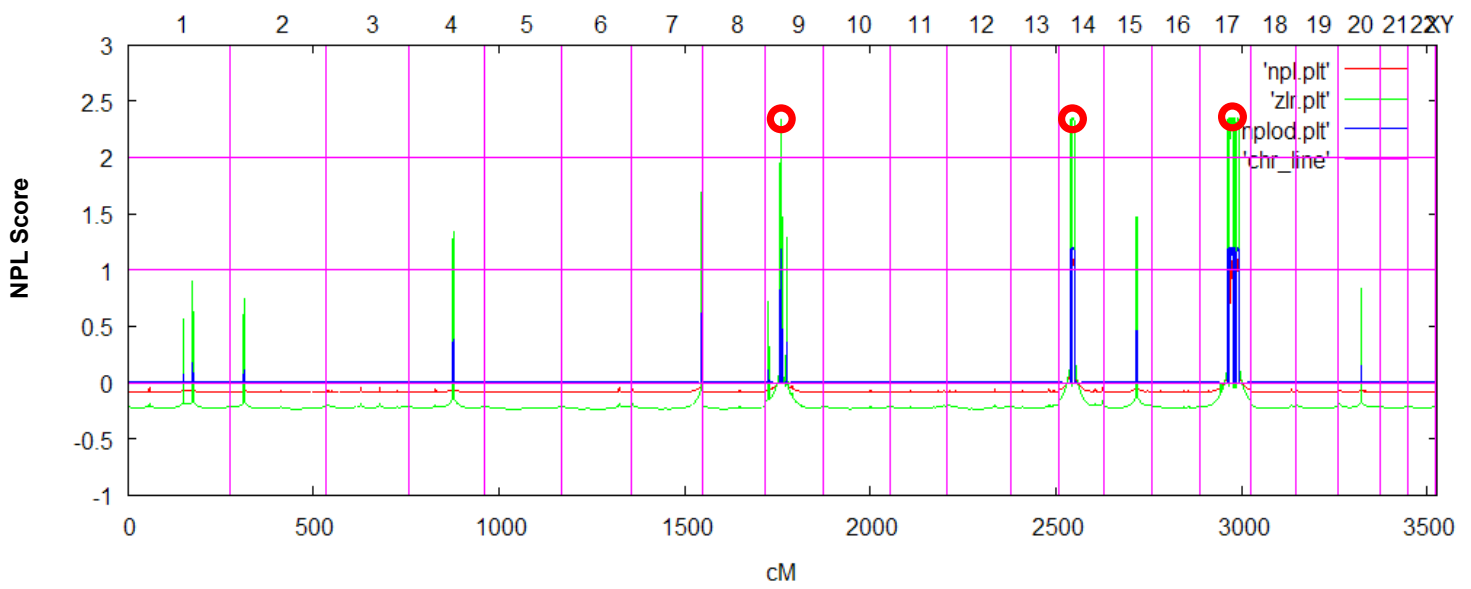

**(Z4) A4227 (#510)**

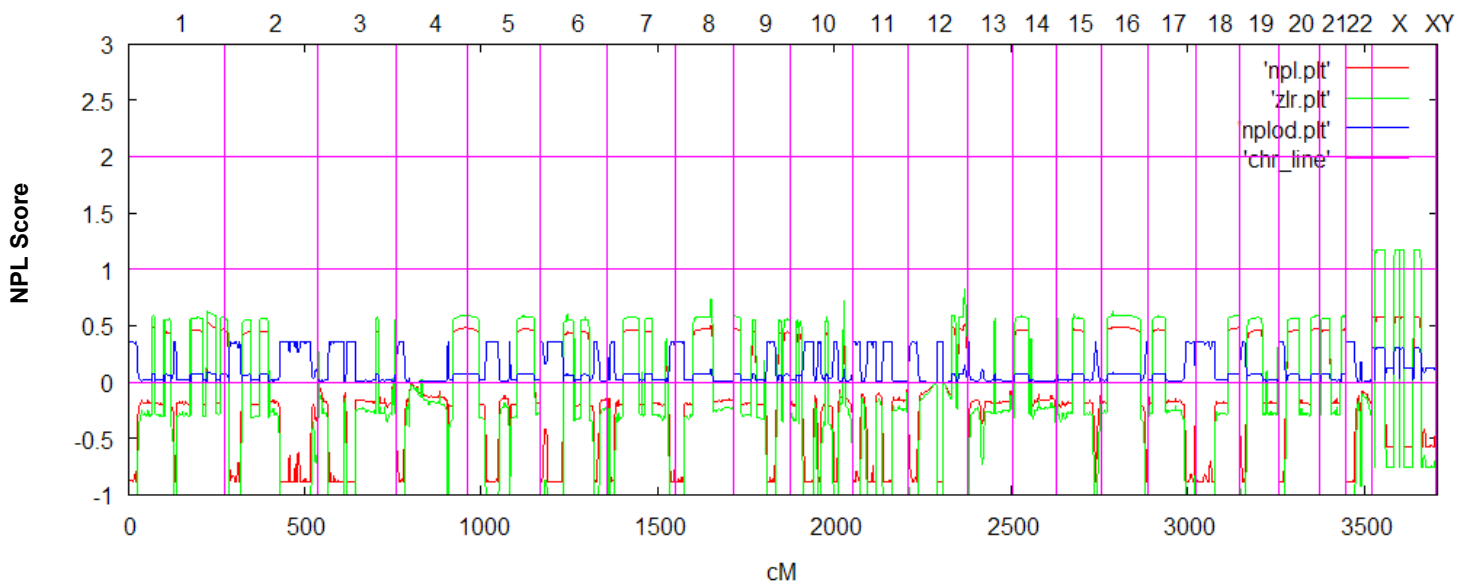

(Z5) A4298 (#651)

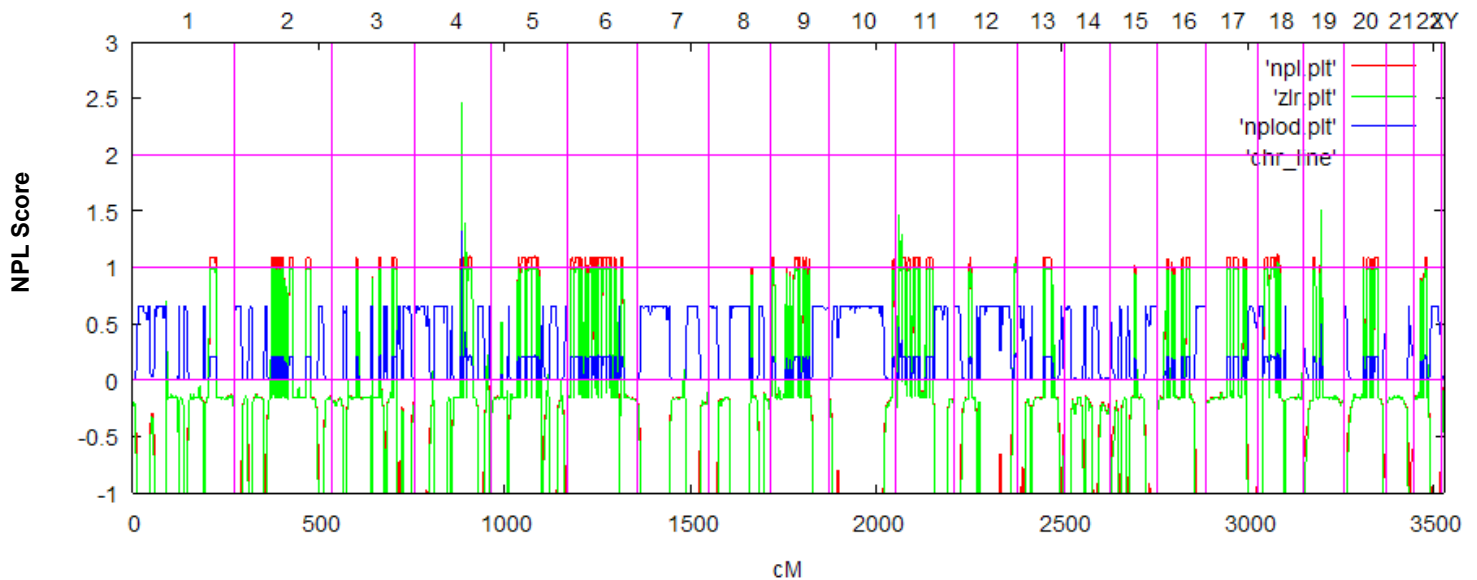

**Figure S1. Homozygosity Mapping and Position of Causative Gene Mutations in 31 Patients/Families with Primary Cilia Dyskinesia (PCD)**

Homozygosity profiles are shown for 21 sib pairs and 10 single individuals with PCD. Non-parametric LOD scores (NPL Score) were calculated for both affected siblings together (or for single affecteds) as described in Hildebrandt *et al.*, *PLoS Genet* 5:e1000353, 2009. using ALLEGRO<sup>12</sup> and assuming first-degree cousin consanguinity of the parents. Non-parametric LOD scores were plotted over genetic distance across the genome, where chromosomal positions are concatenated from p to q-arm (left to right). “Homozygosity peaks” (red circles) represent possible segments of homozygosity by descent, one of which (arrow head) harbors the disease-causing gene in each patient (see **Table 1**, **Table S1** and **Table S2**). Plots are listed in the same order of families as in **Table S1**. Headings depict family identifier, *gene symbol*, and effect of mutation on translation product. (hom),homozygous; (het), heterozygous

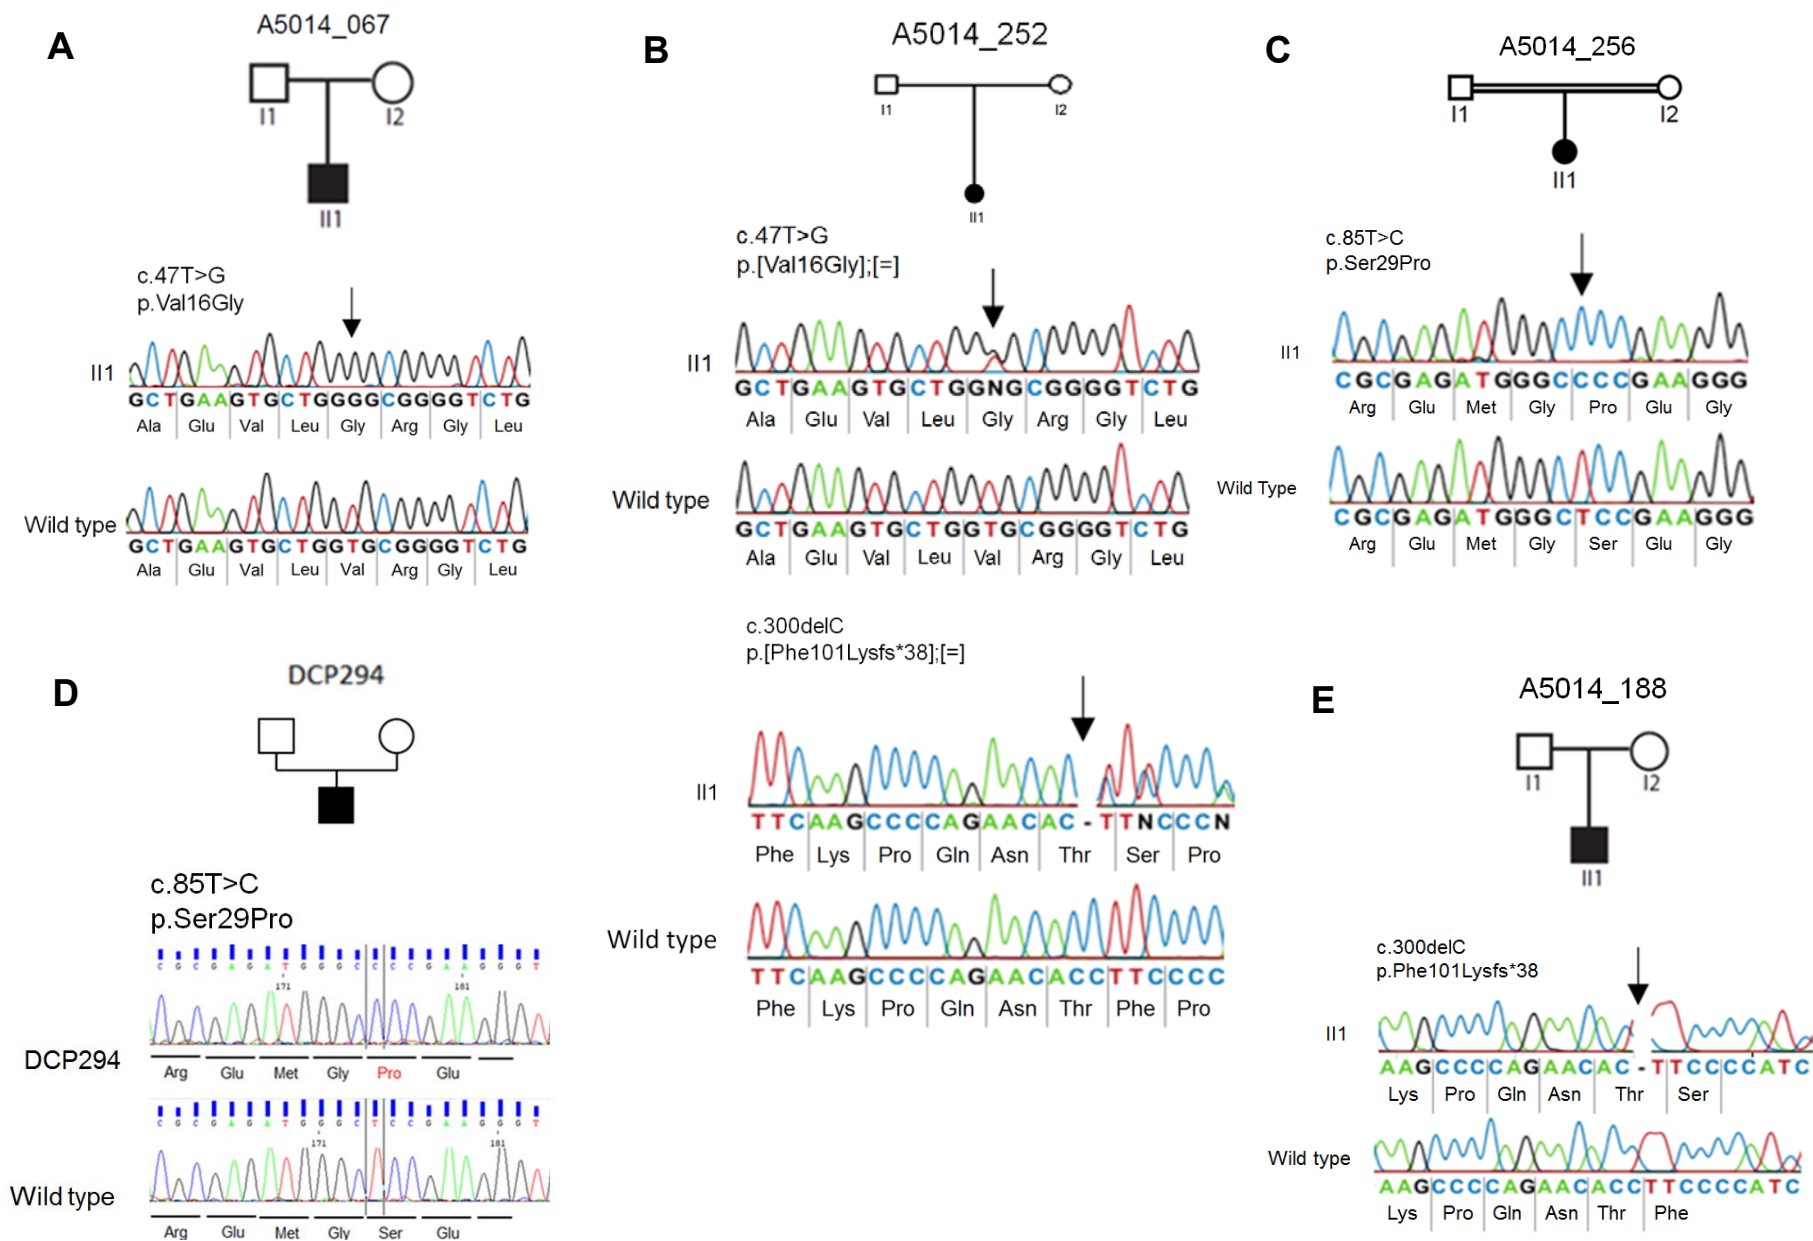

**F**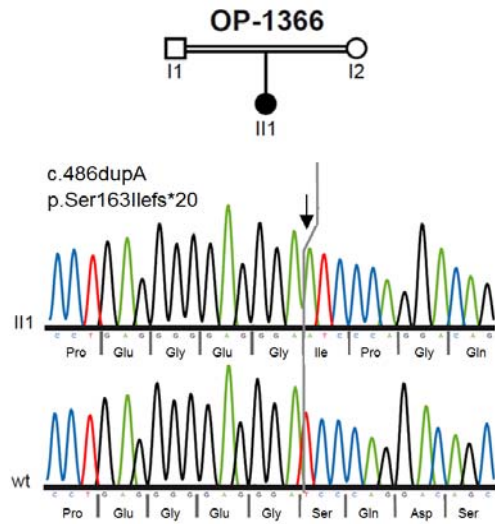**G**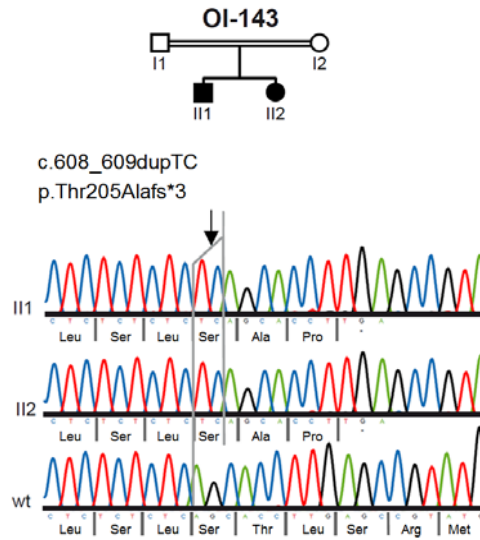**H**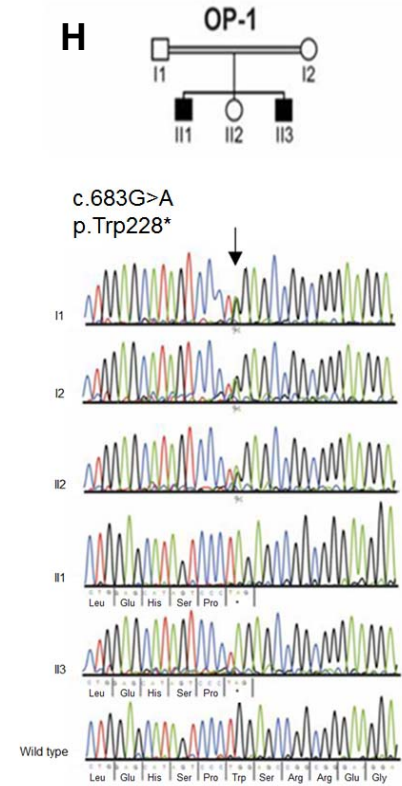**I**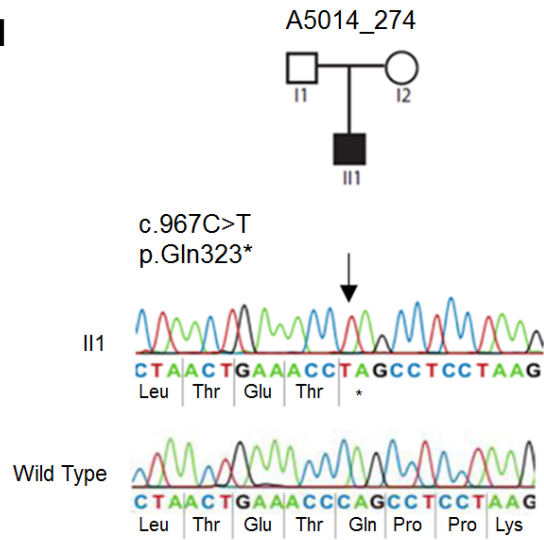**J**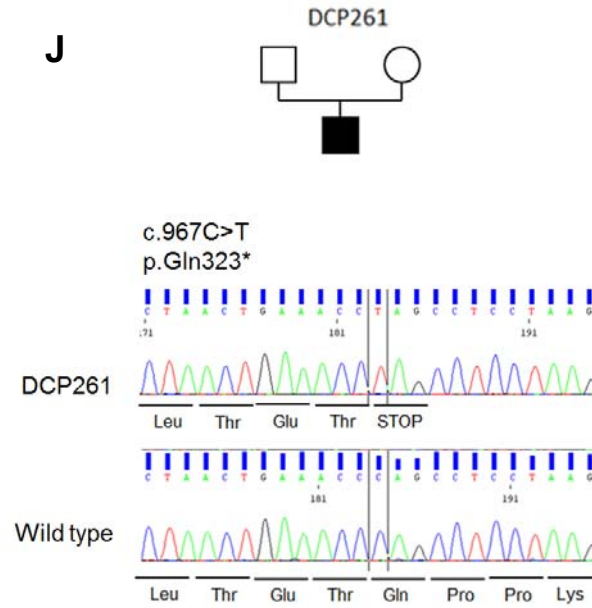



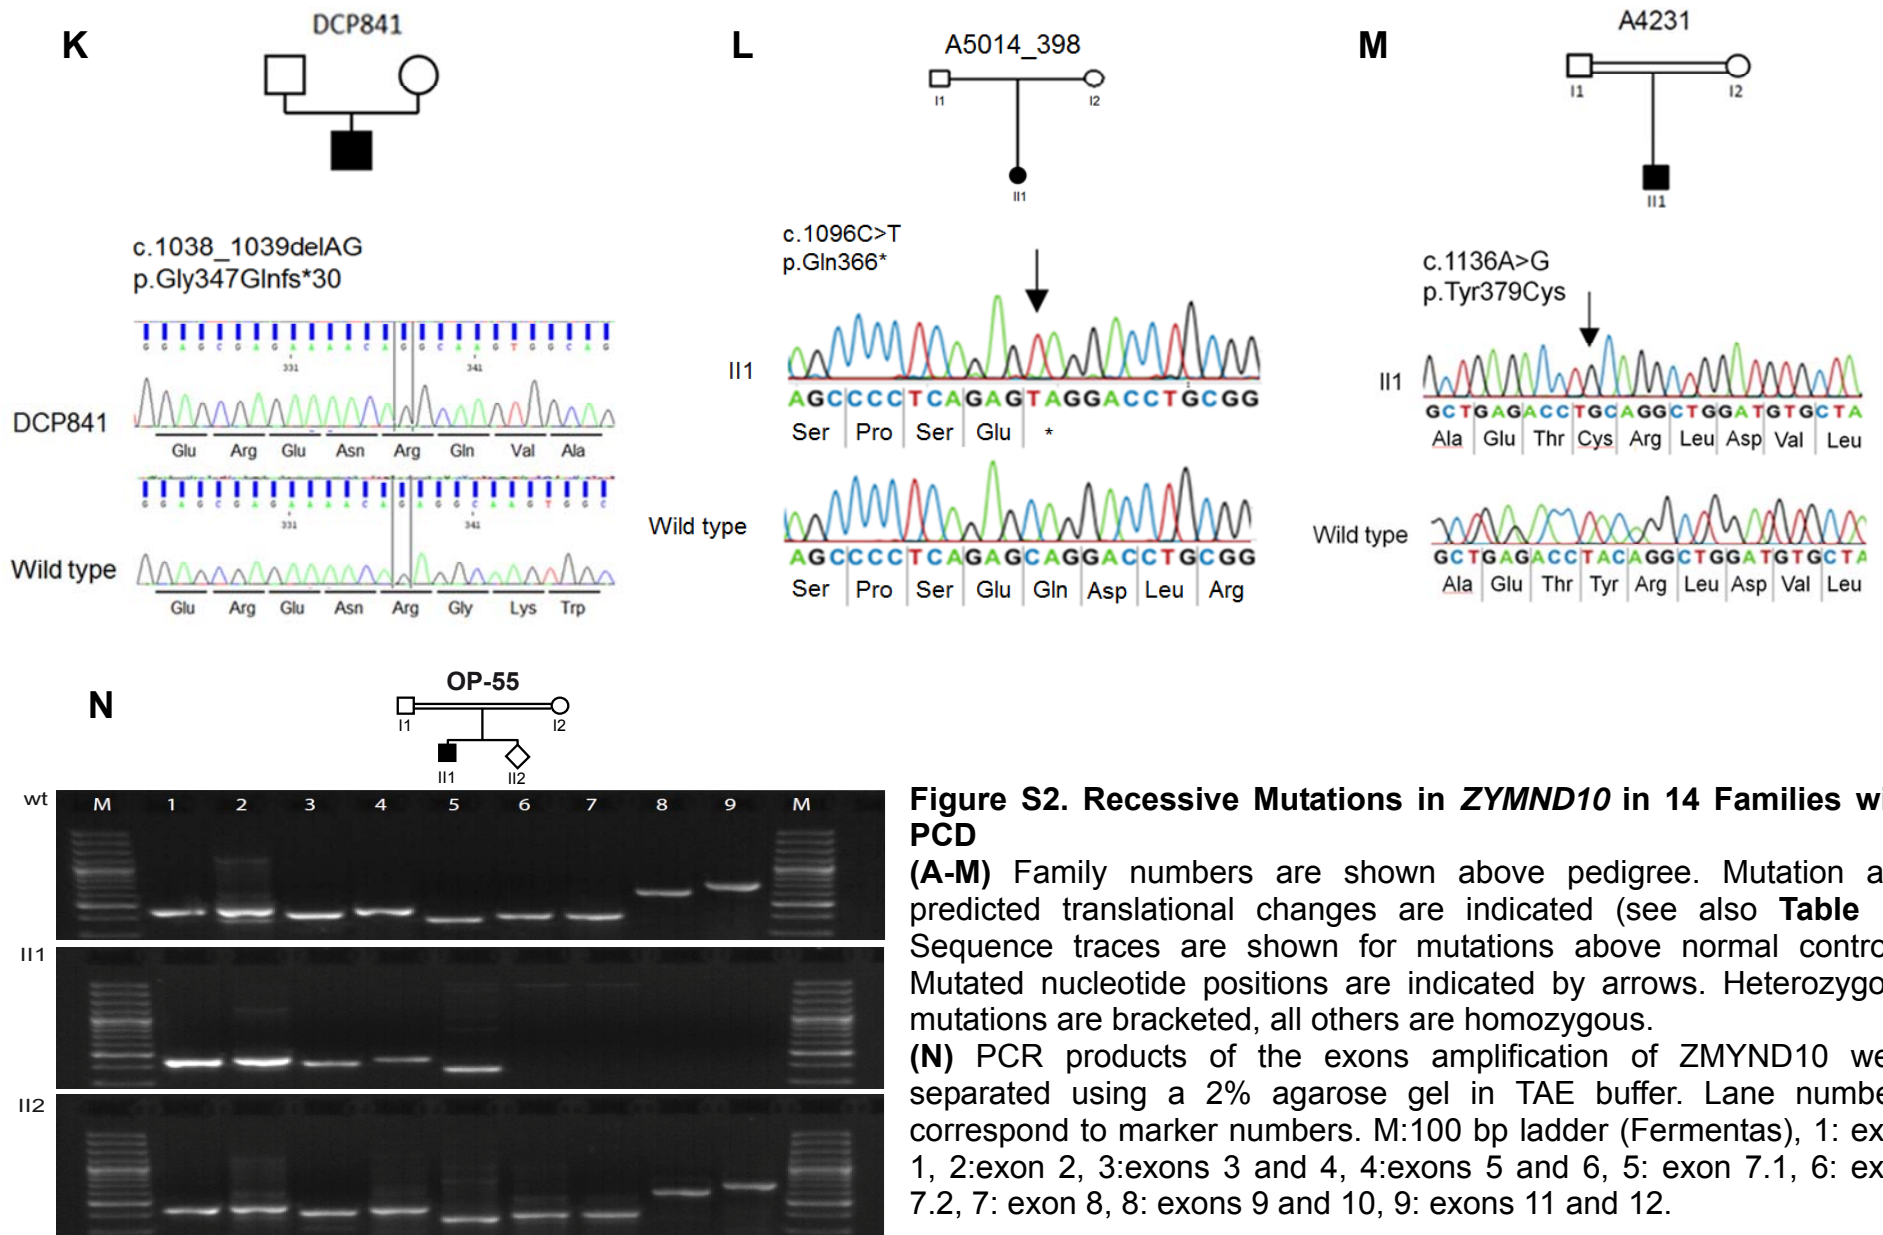

**Figure S2. Recessive Mutations in *ZYMND10* in 14 Families with PCD**

(A-M) Family numbers are shown above pedigree. Mutation and predicted translational changes are indicated (see also **Table 1**). Sequence traces are shown for mutations above normal controls. Mutated nucleotide positions are indicated by arrows. Heterozygous mutations are bracketed, all others are homozygous.

(N) PCR products of the exons amplification of *ZMYND10* were separated using a 2% agarose gel in TAE buffer. Lane numbers correspond to marker numbers. M:100 bp ladder (Fermentas), 1: exon 1, 2:exon 2, 3:exons 3 and 4, 4:exons 5 and 6, 5: exon 7.1, 6: exon 7.2, 7: exon 8, 8: exons 9 and 10, 9: exons 11 and 12.

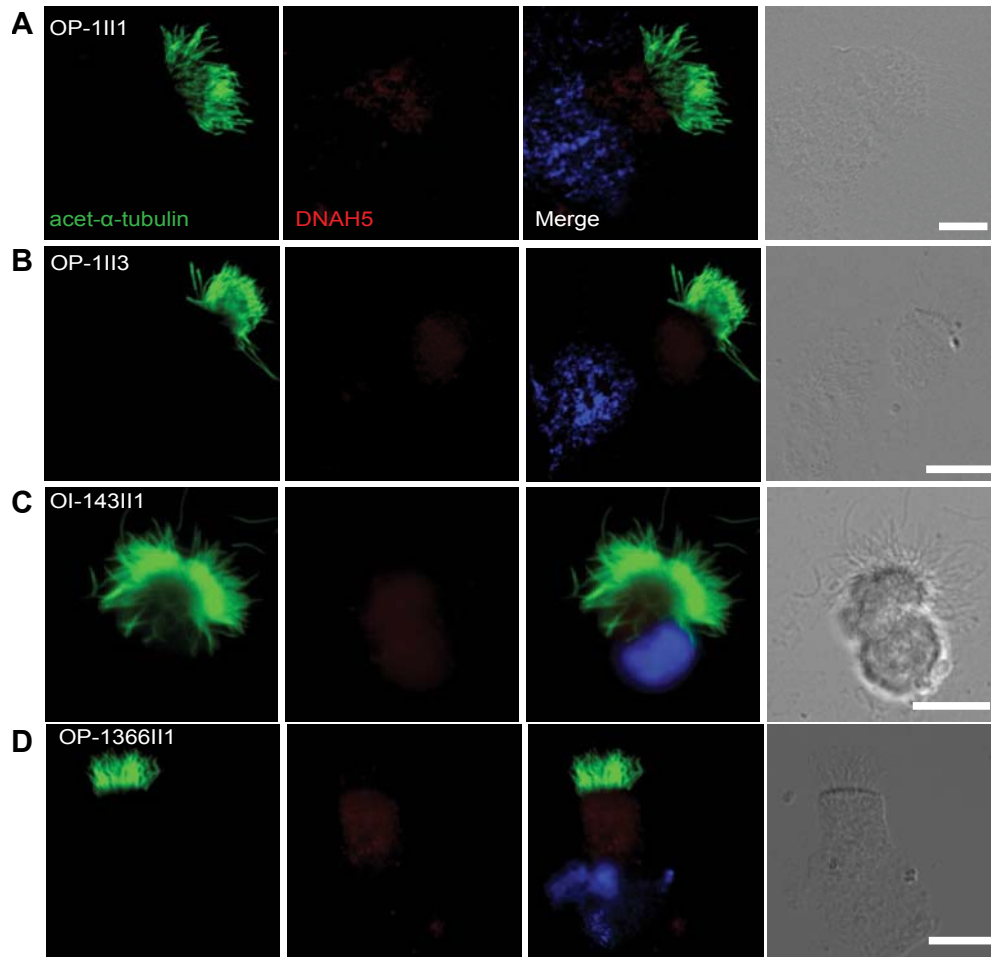

**Figure S3. *ZMYND10* Mutations Result in Outer Dynein Arm (ODA) Defects of Respiratory Cilia**  
 Images of respiratory epithelial cells from patients OP-1111 (A), and OP1-113 (B), OI143-111 (C) and OP1366-111 (D) who carry *ZMYND10* loss-of-function mutations. Cells were co-stained with antibodies against acetylated  $\alpha$ -tubulin (green) and DNAH5 (red). Nuclei were stained with Hoechst 33342 (blue). In respiratory cells of patients (b-g), DNAH5 is not detectable in the ciliary axonemes, suggesting that *ZMYND10* loss-of-function mutations lead to outer dynein arms defects. Scale bars are 10  $\mu$ m.



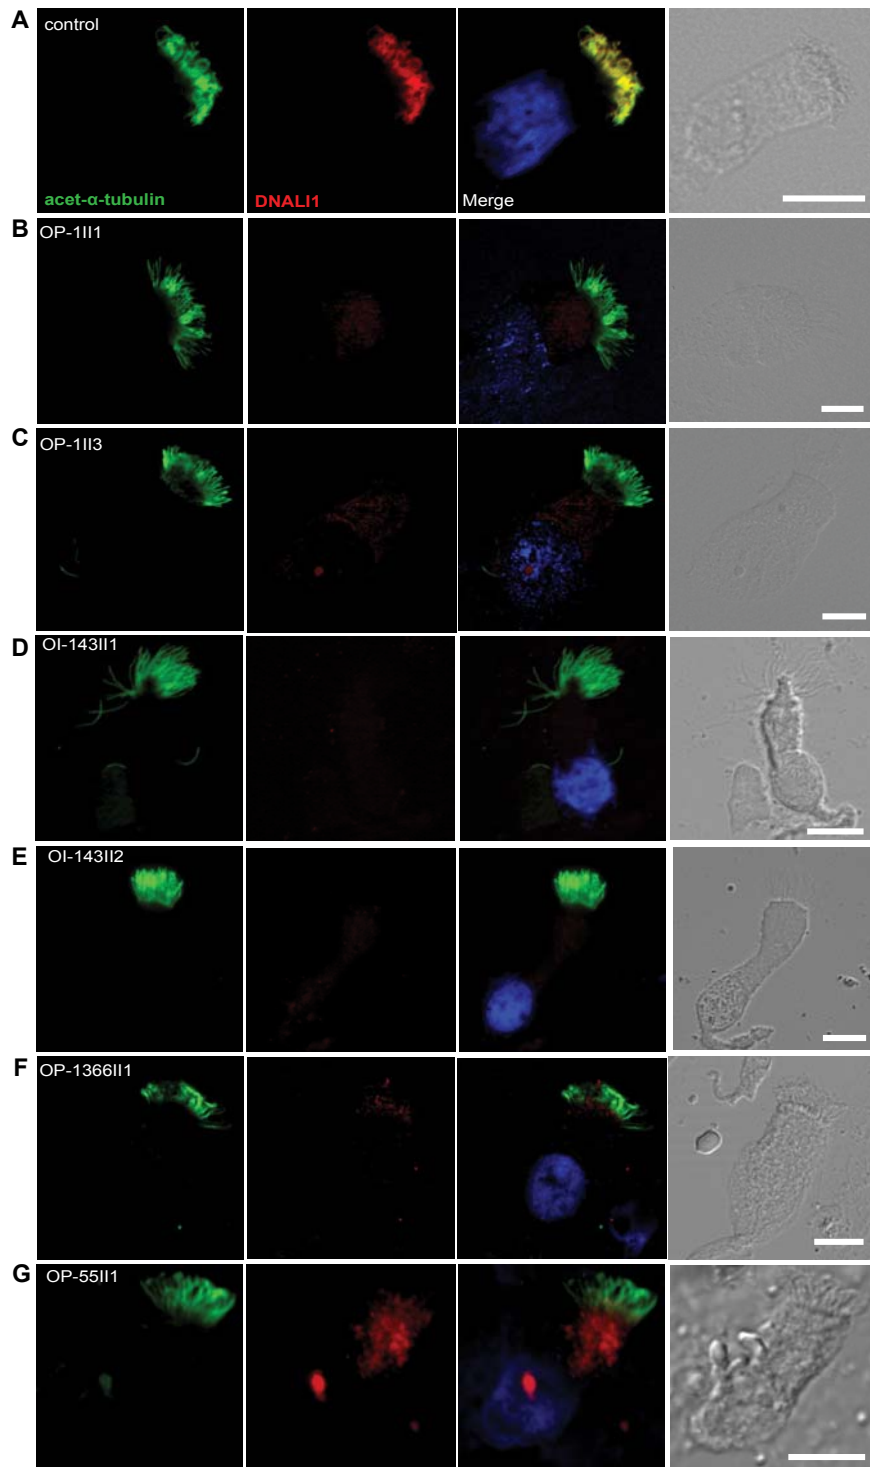

**Figure S4. Abnormal Localization of DNALI1 in Respiratory Epithelial Cells from Individuals with PCD Carrying *ZMYND10* Mutations**

Images of respiratory epithelial cells from a healthy control (A) and from individuals OP-1 II1 (B), and OP-1 II3 (C), OI-143 II1 (D), OI-143 II2 (E), OP-1366 II1 (F) and OP-55 II1 (G) who carry *ZMYND10* loss-of-function mutations. Cells were co-stained with antibodies against acetylated  $\alpha$ -tubulin (green) and DNALI1 (red). Nuclei were stained with Hoechst 33342 (blue). **(A)** In control cells DNALI1 localizes to the axonemes of respiratory cilia. The yellow co-staining within the ciliary axoneme indicates that both proteins co-localize within respiratory cilia. However, in respiratory cells of patients **(B-G)** DNALI1 is not detectable in the ciliary axonemes, suggesting that *ZMYND10* loss-of-function mutations lead to defects in the inner dynein arm light chain DNALI1. Scale bars in A-G, 10 $\mu$ m.

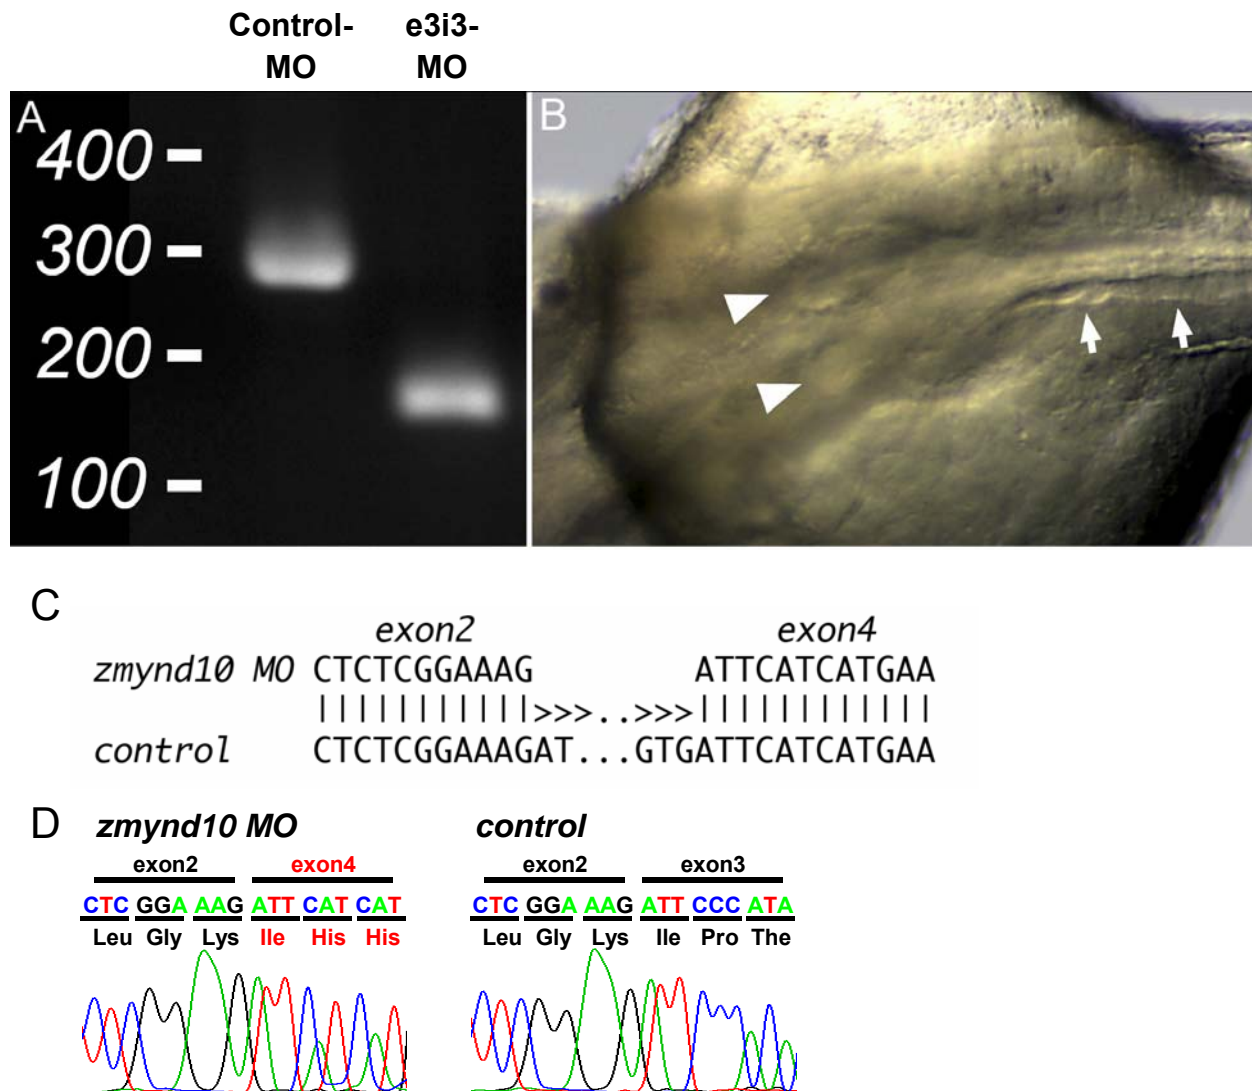

**Figure S5. *zmynd10* Knockdown with e3i3 Splice Donor Morpholino**

**(A)** RT-PCR using primers flanking exon 3 revealed a complete absence of wild type *zmynd10* mRNA in e3i3 morpholino injected embryos and a 117 bp deletion product representing an in-frame fusion of exons 2 and 4 (**C** and **D**; exon 3 deletion).

**(B)** *zmynd10* e3i3 injected embryos show pronephric cysts (arrowheads) and dilated pronephric tubules (arrows), similar to the phenotype observed in *zmynd10* translation blocking morpholino injected embryos.

**(C)** RT-PCR using primers flanking exon 3 revealed an in-frame fusion of exons 2 and 4 (exon 3 deletion).

**(D)** Chromatogram of RT-PCR products.

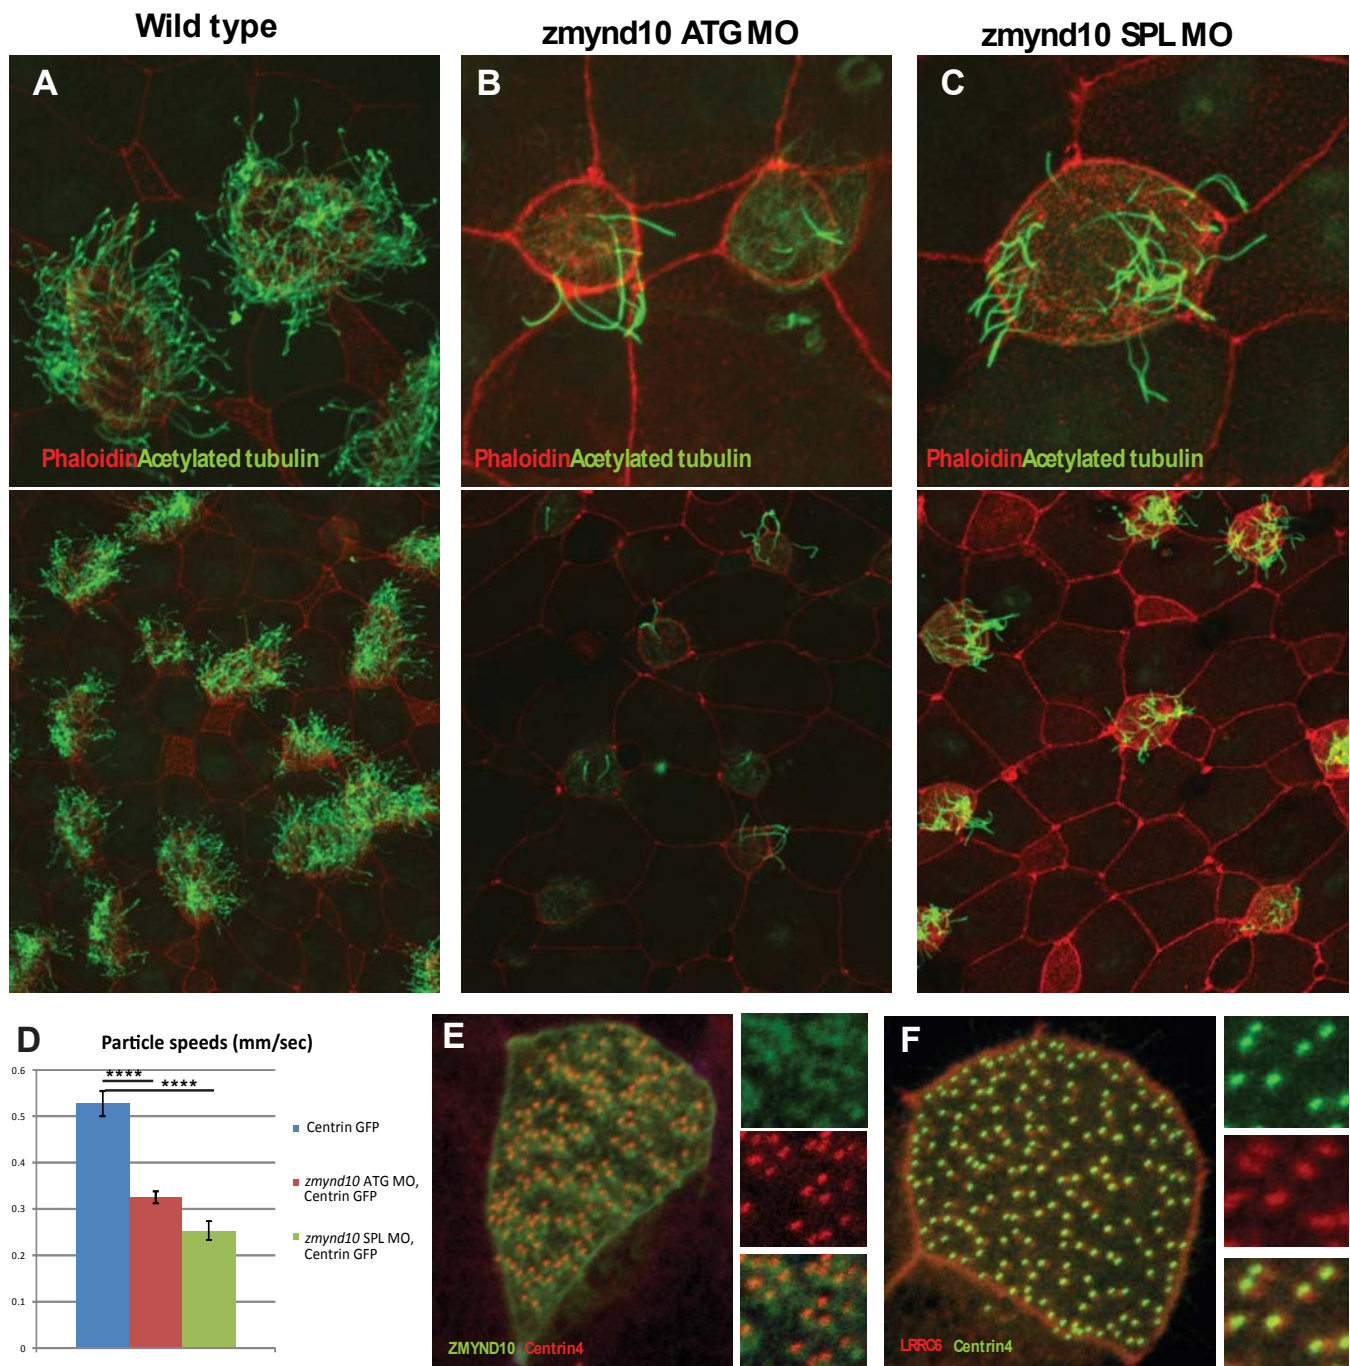

**Figure S6. Morpholino Knockdown Phenotype and Localization of *zmynd10***

**(A-C)** Wild-type and *zmynd10* morphant embryos stained with the cilia marker acetylated  $\alpha$ -tubulin (green) and the actin marker phalloidin (red). Both the ATG and splice (SPL) morpholinos result in a substantial decrease in cilia number relative to control cells.

**(D)** Quantification of cilia-generated fluid flow in wild type and morphant embryos. (\*\*\*\*  $P < 0.0001$ ).

**(E)** Co-localization of GFP-centrin4 (green) with RFP-hsLRRC6 (red) at the basal bodies of *Xenopus* multi-ciliated cells.

**(F)** Localization of GFP-hsZMYND10 (green) to the basal bodies marked with Centrin4-RFP (red) as well as to the striated rootlets that project away from the basal bodies.

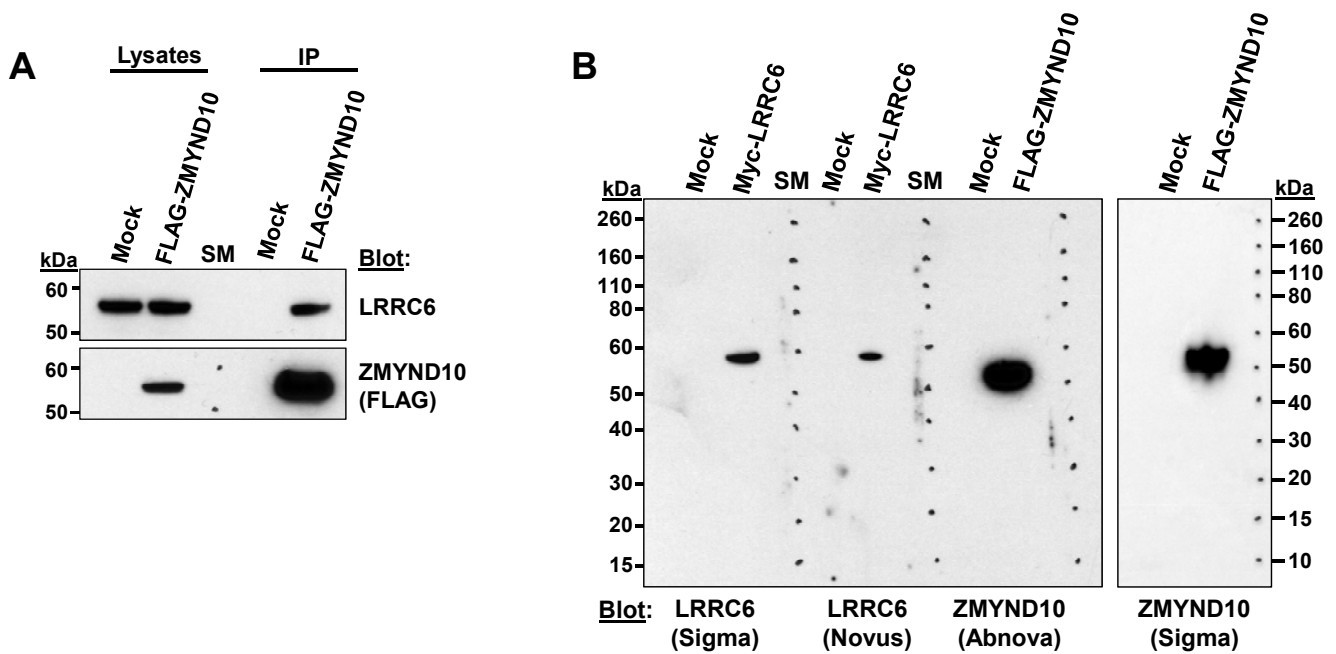

**Figure S7. ZMYND10 and LRRC6 Interact with Each Other**

(A) Human tracheal epithelial cells (HTEpC) were cultured and transfected with FLAG-ZMYND10 using Cytofect™ (Cell Application, Inc.) according to the manufacturer’s protocol. The protein complex precipitated by an anti-FLAG antibody includes endogenous LRRC6 in HTEpC.

(B) Specificity of LRRC6 and ZMYND10 antibodies used in this study. FLAG-tagged ZMYND10 and Myc-tagged LRRC6 constructs were transfected into HEK 293T cells. The immunoblots show that antibodies recognize overexpressed proteins and do not give nonspecific bands.

SM denotes size marker.



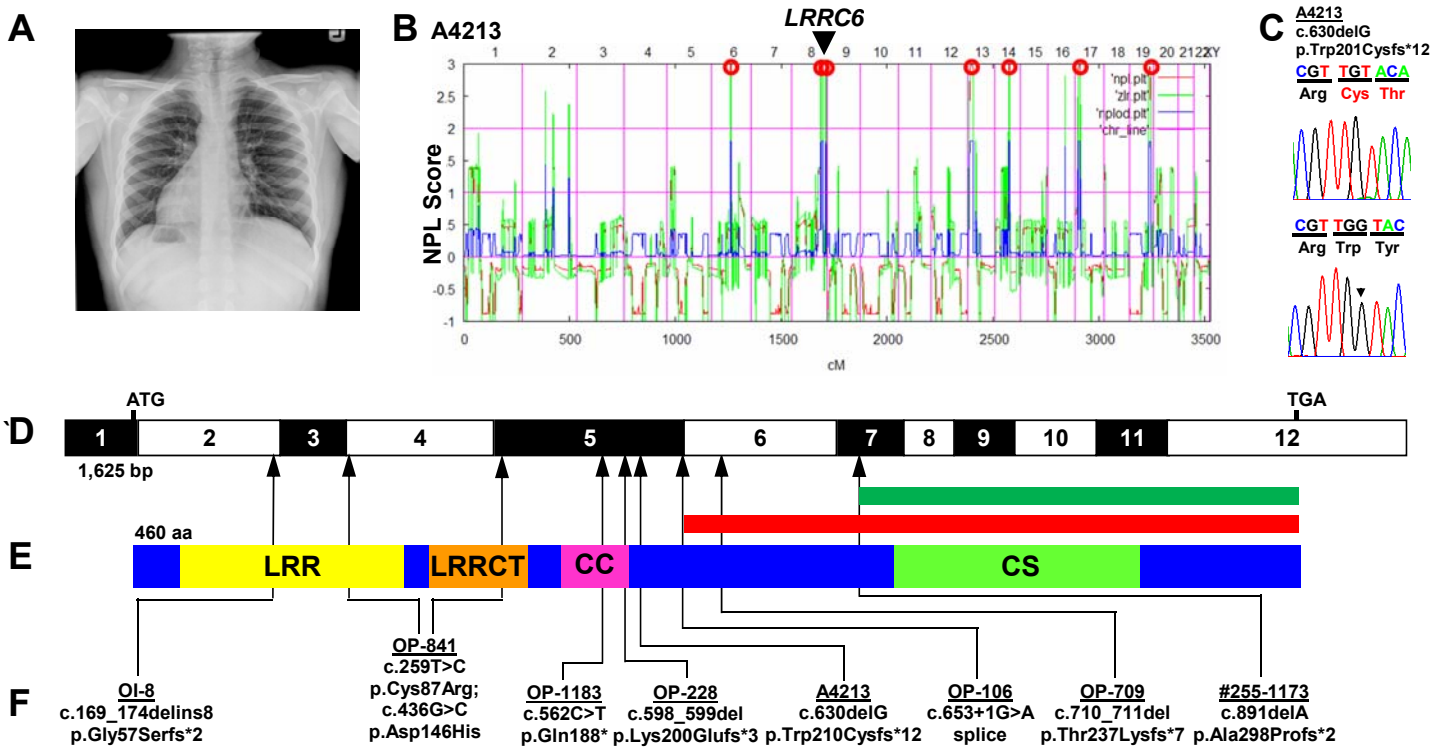

**Figure S8. Homozygosity Mapping and Whole Exome Resequencing in PCD Family A4213, and Identification of 7 Different Homozygous and 2 Compound Heterozygous Mutations in *LRR6* in 13 Families with PCD**

(A) Chest X-ray of PCD individual A4213-21 demonstrates *situs inversus*.

(B) For PCD individual A4213 non-parametric lod scores (NPL) from whole genome mapping are plotted across the human genome. The x-axis shows Affymetrix 250K *Styl* array SNP positions on human chromosomes concatenated from *p*-ter (left) to *q*-ter (right). Genetic distance is given in cM. Seven maximum NPL peaks (red circles) indicate candidate regions of homozygosity by descent. Note that the *LRR6* locus (arrow head) is positioned within one of the maximum NPL peaks on chromosome 8q.

(C) Homozygous *LRR6* mutation detected in PCD individual A4213-21. Individual number (underlined), mutation (arrowhead), and predicted translational changes are indicated (see also **Table S2**). Sequence trace is shown for mutation above normal controls.

(D) Exon structure of human *LRR6* cDNA. Positions of start codon (ATG) and of stop codon (TGA) are indicated.

(E) Domain structure of *LRR6* indicates the 4 recognizable domains: LRR (Leucine-rich repeat), LRRCT (C-terminal to leucin-rich repeat), CC (coiled-coil), and CS (CHORD-containing proteins and SGT1). The green and red bars delineate the region necessary for interaction with *ZMYND10* (see **Figure 3A**), and *DVL3* (see **Figure S13**), respectively.

(F) Nine different homozygous or heterozygous (family OP-841) *LRR6* mutations detected in 13 families with PCD. Family number (underlined), mutation, and predicted translational changes are indicated (see **Table S2** and **Figure S9**).

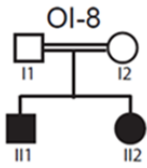

c.169\_173delinsTCCCAAT  
p.Gly57Serfs\*3

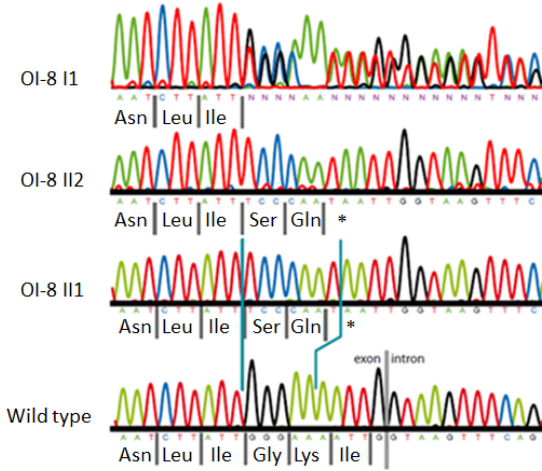

OP-841

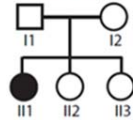

c.259T>C  
p.[Cys87Arg];[=]

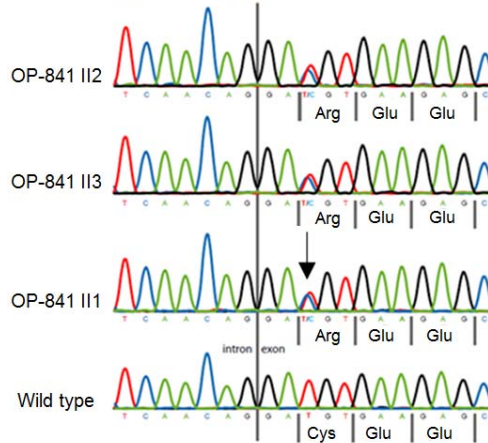

OP-1183

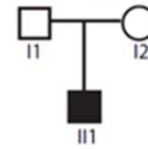

c.562C>T  
p.Gln188\*

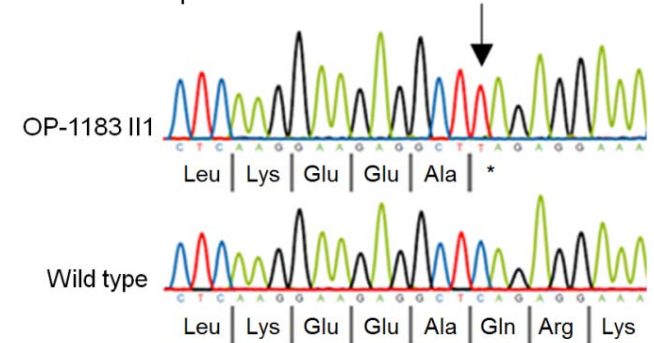

c.436G>C  
p.[Asp146His];[=]

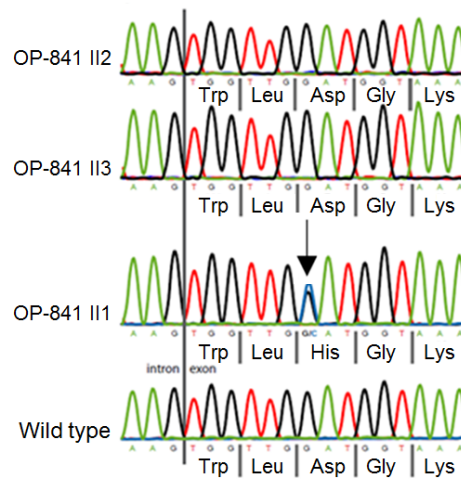

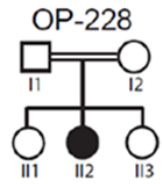

c.598\_599delAA  
p.Lys200Glufs\*3

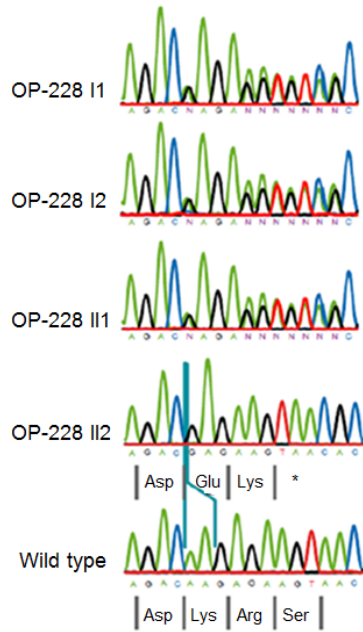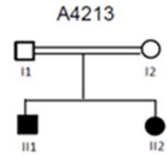

c.630delG  
p.Trp210Cysfs\*12

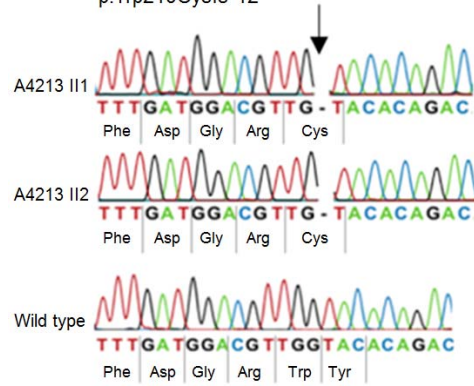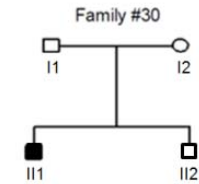

c.630delG  
p.Trp210Cysfs\*12

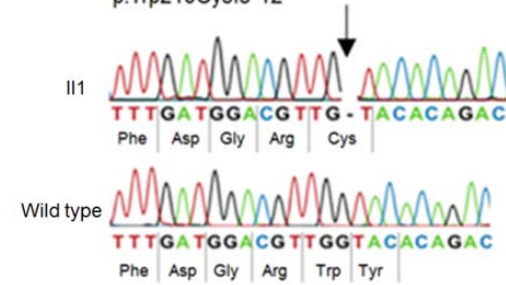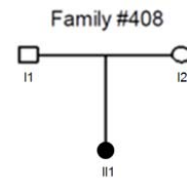

c.630delG  
p.Trp210Cysfs\*12

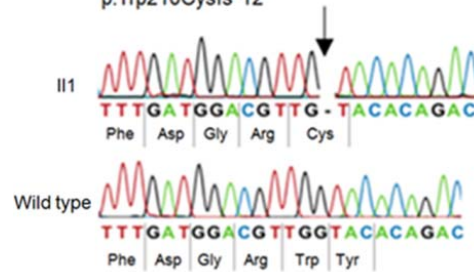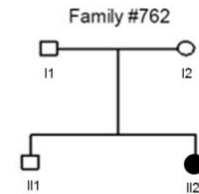

c.630delG  
p.Trp210Cysfs\*12

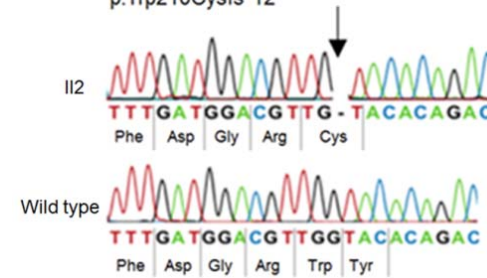

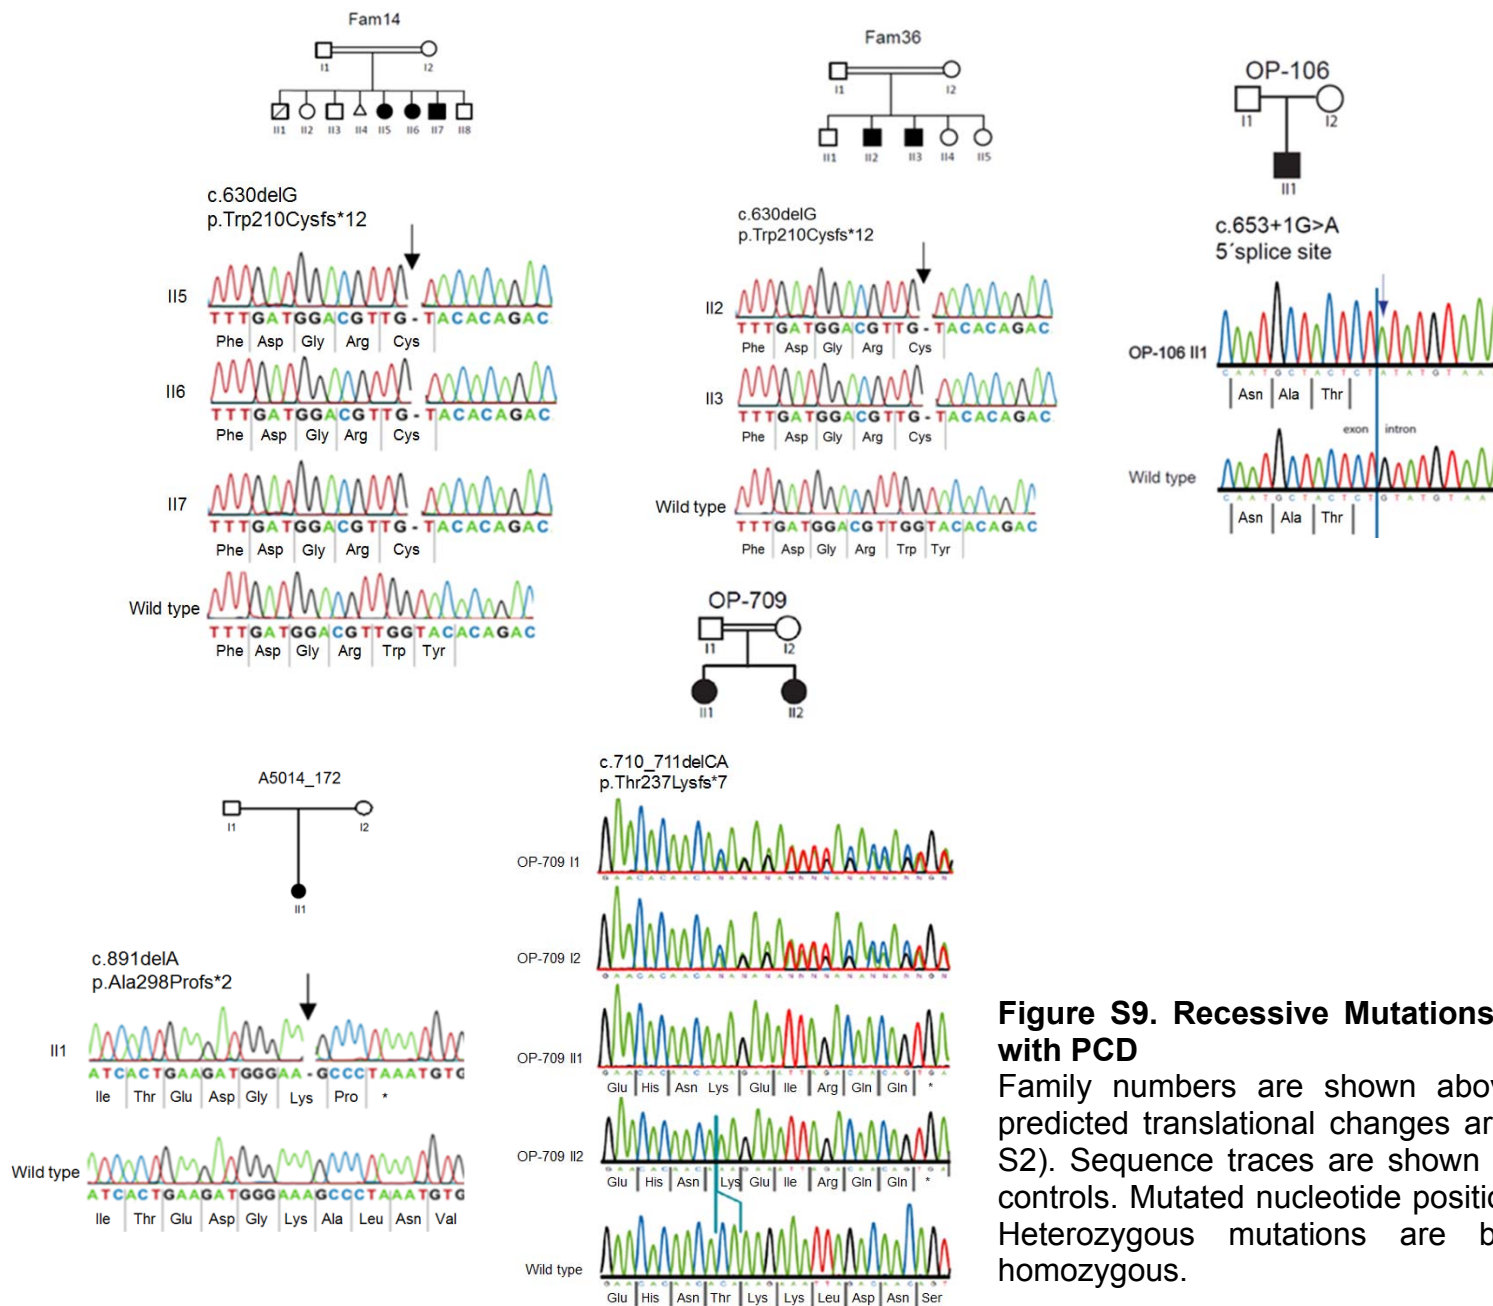

**Figure S9. Recessive Mutations in *LRRC6* in 13 Families with PCD**

Family numbers are shown above pedigree. Mutation and predicted translational changes are indicated (see also Table S2). Sequence traces are shown for mutations above normal controls. Mutated nucleotide positions are indicated by arrows. Heterozygous mutations are bracketed, all others are homozygous.



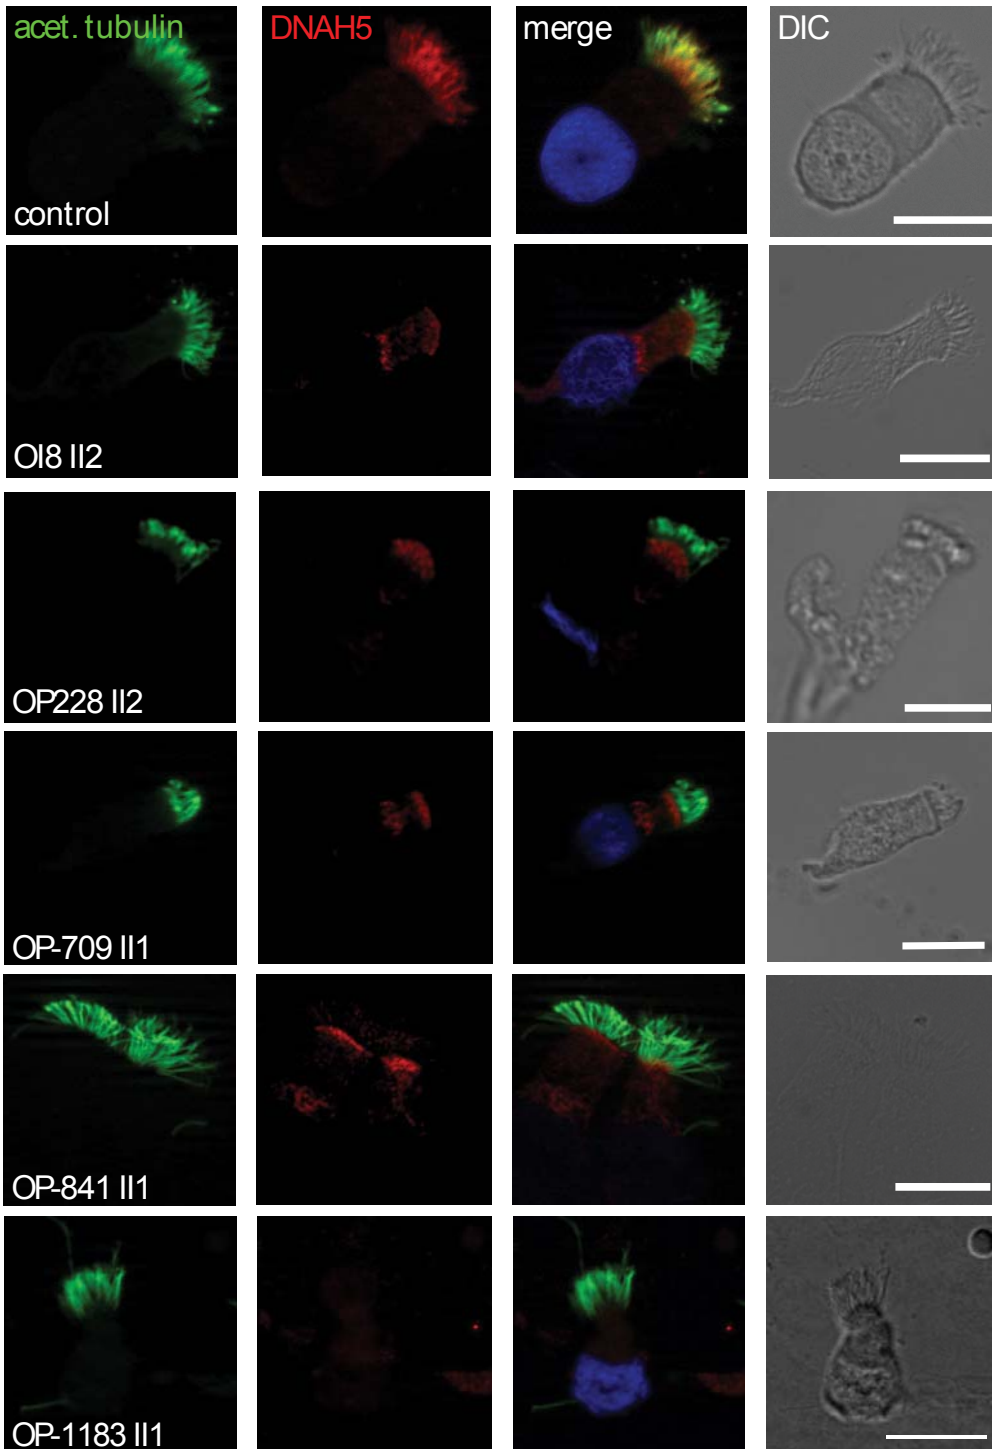

**Figure S10. Lack of the Axonemal Outer Dynein arm (ODA) Component DNAH5 in Respiratory Epithelial Cells of Nasal Brushings from PCD Individuals with PCD and *LRRC6* Mutations**

High-resolution immunofluorescence microscopy of respiratory cells from a healthy control and individuals with PCD: OI-8 II2, OP-228 II2, OP-709 II1, OP-841 II1, and OP-1183 II1. An antibody directed against outer dynein arm (ODA) heavy chain DNAH5 (present in type 1 and type 2 ODAs) was used (red). As a control for ciliary axonemes, acetylated  $\alpha$ -tubulin was stained (green). Note that in *LRRC6* mutant cells, DNAH5 is absent from the axonemes consistent with defects of ODA assembly. Nuclei were stained with Hoechst 33342 (blue). White scale bars represent 10  $\mu$ m.

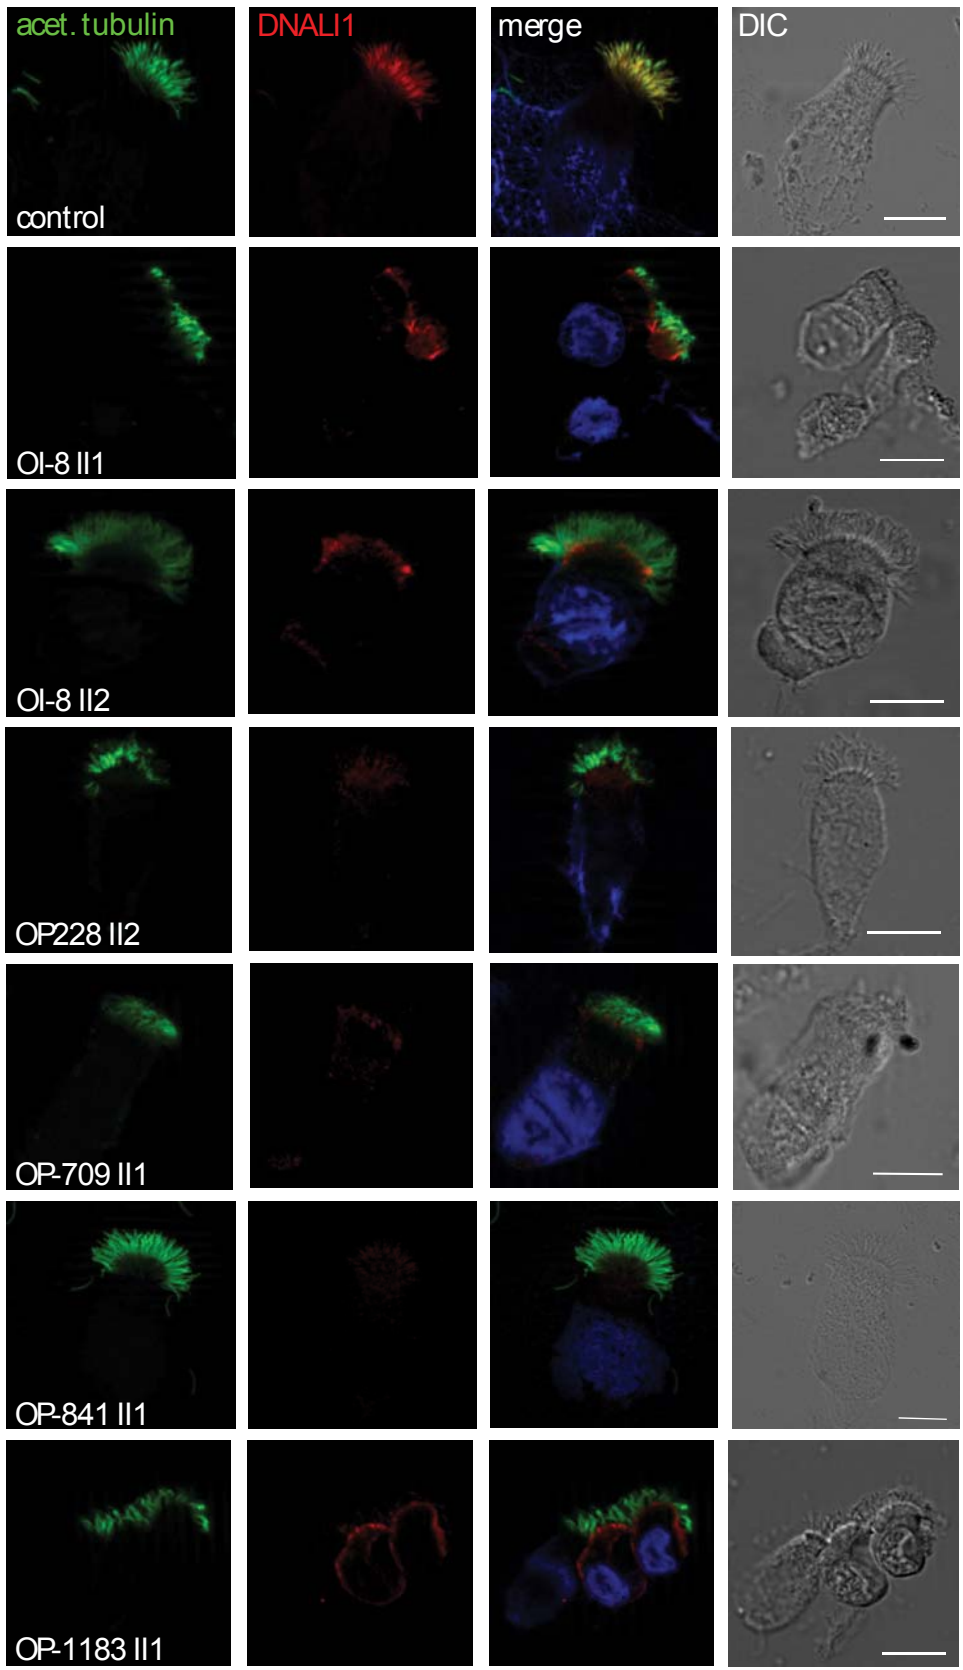

**Figure S11. Lack of the Axonemal Inner Dynein Arm (IDA) Component DNALI1 in Respiratory Epithelial Cells of Nasal Brushings from PCD Individuals with PCD and *LRRC6* Mutations**

High-resolution immunofluorescence microscopy of respiratory cells from a healthy control and individuals with PCD: OI-8 II1, OI-8 II2, OP-228 II2, OP-709 II1, OP-841 II1, and OP-1183 II1. An antibody directed against IDA light chain DNALI1 was used (red). As a control for ciliary axonemes, acetylated  $\alpha$ -tubulin was stained (green). Note that DNALI1 is absent from the axonemes of mutant respiratory cells consistent with assembly defects of DNALI1 containing IDA complexes. Nuclei were stained with Hoechst 33342 (blue). White scale bars represent 10  $\mu$ m.

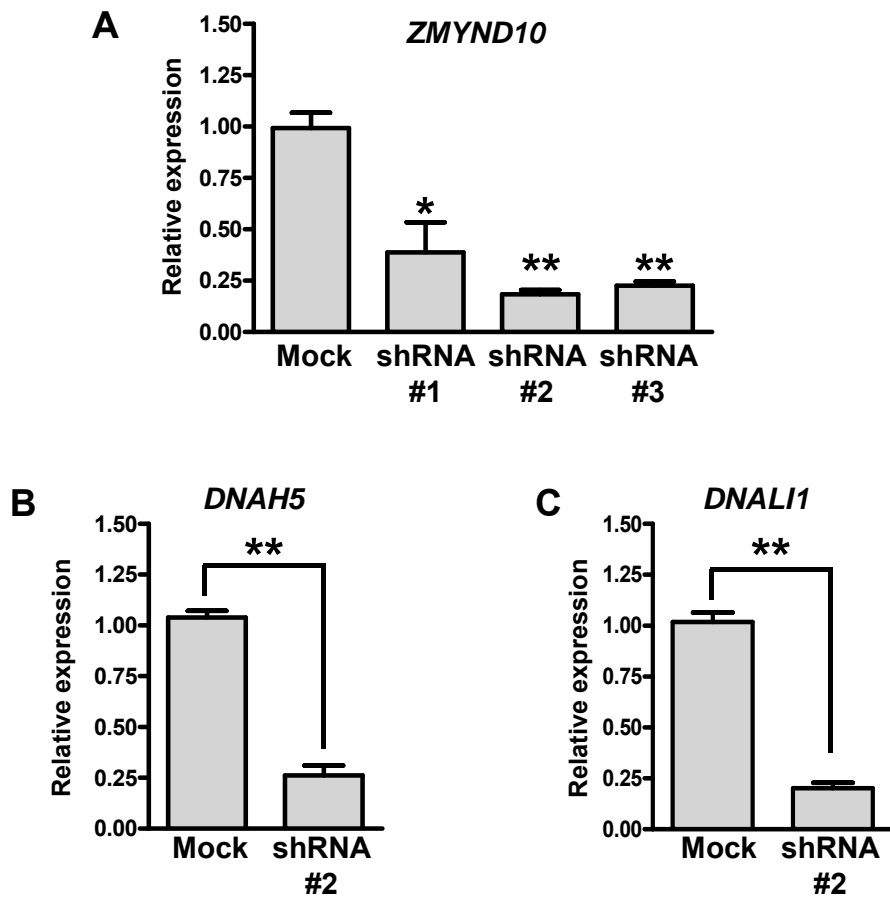

**Figure S12. Real-Time PCR Analysis of DNAH5 and DNALI1 Expression in Human Tracheal Epithelial Cells**

**(A)** *ZMYND10*-specific shRNAs were transfected to human tracheal epithelial cells using lentiviral systems. The transfected cells were selected using puromycin. Realtime PCR were performed as previously described.<sup>14</sup> TaqMan probes for *ZMYND10* (Hs01106059\_m1), *DNAH5* (Hs00292485\_m1), *DNALI1* (Hs00185750\_m1), and *glyceraldehyde-3-phosphate dehydrogenase* (*GAPDH*) (Hs02758991\_g1) were purchased from Applied Biosystems. The target sequences of shRNAs are GCTACATCACAGACTGTGTGG (shRNA#1), GTCTTGACTTGGTAGACTAT (shRNA#2) and GGTGTGTGAGTCAGCAGAAGA (shRNA#3).

**(B-C)** The expression of both ODA component DNAH5 and IDA component DNALI1 was significantly decreased in cells transfected with *ZMYND10*-specific shRNA.

\* and \*\* indicate  $p < 0.05$  and  $p < 0.001$  in student t-test compared to control cells.

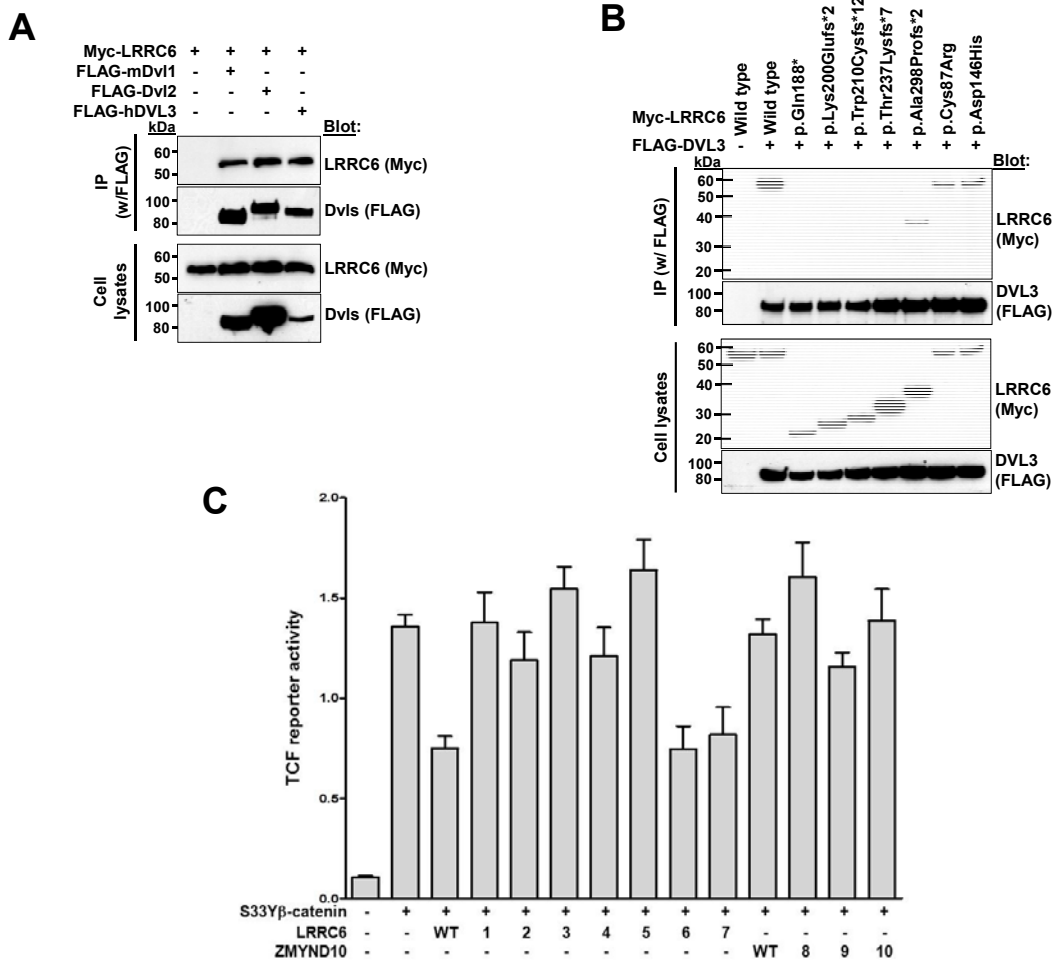

**Figure S13. LRRC6 Inhibits  $\beta$ -Catenin-Induced Activation of T Cell Factor (TCF)-Dependent Transcription, but ZMYND10 Does Not**

**(A)** Protein-protein interaction between LRRC6 and Dvls. All of the Dvls (Dvl1, Dvl2 and DVL3) interact with LRRC6.

**(B)** Protein-protein interaction between LRRC6 and DVL3. Note that the four truncating proteins (p.Gln188\*, p.Lys200Gluufs\*3, p.Trp210Cysfs\*12 and p.Thr237Lysfs\*7) abrogate interaction with LRRC6, whereas the other three defective proteins (p.Ala298Profs\*2, p.Cys87Arg and p.Asp146His) do not.

**(C)** Overexpression of LRRC6 WT inhibits  $\beta$ -catenin-induced activation of a TCF-dependent reporter gene. HEK 293 cells were transiently transfected with an empty vector pcDNA3 or pcDNA3-S33Y  $\beta$ -catenin together with LRRC6 (WT and mutants) or ZMYND10 (WT and mutants). Cells were harvested 24 hr later. The ratio between the luciferase activity obtained from the cotransfected TCF-responsive reporter (pTOPFLASH) and the control luciferase reporter gene construct (pGL4.74[hRLuc/YK]) was calculated and is designated as "TCF reporter activity". Note that whereas all the truncating proteins (1-5) of LRRC6 fail to inhibit TCF reporter activity, two defective proteins resulting from a missense mutation (6-7) do not show any difference compared to WT. ZMYND10 WT or truncating proteins (8-10) do not have any effect on TCF reporter activity.

The 1-7 in **(C)** are mutants of LRRC6: 1, p.Gln188\*; 2, p.Lys200Gluufs\*3; 3, p.Trp210Cysfs\*12; 4, p.Thr237Lysfs\*7; 5, p.Ala298Profs\*2; 6, p.Cys87Arg; 7, p.Asp146His. The 8-10 in **(C)** are mutants of ZMYND10: 8, p.Phe101Serfs\*38; 9, p.Gln323\*; 10, p.Gln366\*.

**Table S1. Biallelic Mutations in Known Genes Associated with PCD in 15 of 31 Families with Homozygosity Mapping Data**

| Family-Individual <sup>a</sup>                             | Ethnic origin     | Causative Gene | Nucleotide alteration                                      | Deduced protein change                                                                                     | Exon (Zygoty)                  | Parental consanguinity | Clinical and ultrastructural findings                     |
|------------------------------------------------------------|-------------------|----------------|------------------------------------------------------------|------------------------------------------------------------------------------------------------------------|--------------------------------|------------------------|-----------------------------------------------------------|
| <b><u>Mutations in known genes associated with PCD</u></b> |                   |                |                                                            |                                                                                                            |                                |                        |                                                           |
| <b>A4197 (#8)</b><br>-21 (#50)<br>-23 (#49)                | Caucasian         | <b>DNAH5</b>   | <b>c.1090-6A&gt;G</b><br><br><b>c.6230T&gt;C</b>           | <b>p.(?)</b><br>(splice acceptor site, predicted by Human Splicing Finder)<br><b>p.Phe2077Ser</b>          | Intron 8 (het)<br><br>37 (het) | No                     | ODA defect                                                |
| <b>A4233 (#647)</b><br>- 21 (#1978)<br>- 22 (#1979)        | Caucasian/Mormon  | <b>DNAH5</b>   | <b>c.5983C&gt;T</b><br><br><b>c.8498G&gt;A</b>             | <b>p.Arg1995*</b><br><br><b>p.Arg2833His</b>                                                               | 36 (het)<br>51 (het)           | No                     | ODA defects in >60% of cilia                              |
| <b>A4201 (#20)</b><br>-21 (#153)<br>-22 (#154)             | Caucasian         | <b>DNAH5</b>   | c.6249G>A<br><br><b>c.10384C&gt;T</b>                      | p.Met2083Ile<br>(80% conserved splice donor)<br><b>p.Gln3462*</b>                                          | 37 (het)<br>61 (het)           | No                     | ODA defect<br>-21: +SI                                    |
| <b>A4207 (#100)</b><br>-21 (#618)<br>-22 (#619)            | Caucasian         | <b>DNAH5</b>   | <b>c.9427A&gt;T</b><br><br>c.10615C>T                      | <b>p.Lys3143*</b><br><br>p.Arg3539Cys                                                                      | 56 (het)<br>63 (het)           | No                     | ODA defect                                                |
| <b>A4200 (#11)</b><br>-22 (#72)<br>-23 (#71)               | German-Mennonites | <b>DNAH5</b>   | <b>c.10384C&gt;T</b>                                       | <b>p.Gln3462*</b>                                                                                          | 61 (Hom)                       | Yes                    | ODA defects<br>-22: SI                                    |
| <b>A4293 (#1)</b><br>-21 (#1)<br>-22 (#2)<br>-23 (#3)      | Caucasian         | <b>CCDC39</b>  | c.610-2A>G<br>(Intron 5)<br><br><b>c.830_831delCA</b>      | p.(?)<br>(100% conserved splice acceptor site)<br><b>p.Thr277Argfs*3</b>                                   | Intron 5 (het)<br><br>7 (het)  | No                     | IDA defects with microtubular disorganization<br>-21: +SI |
| <b>A4195 (#2)</b><br>-21 (#10)<br>-22 (#11)                | Caucasian         | <b>CCDC39</b>  | <b>c.1528-1543A&gt;G</b><br><br><b>c.1540_1544delTTTAT</b> | <b>p.(?)</b><br>(novel splice acceptor site, predicted by Human Splicing Finder)<br><b>p.Phe514Glnfs*5</b> | 12 (het)<br><br>12 (het)       | No                     | IDA defects with microtubular disorganization<br>-21: +SI |
| <b>A4199 (#10)</b><br>-21 (#66)<br>-22 (#67)               | Caucasian         | <b>CCDC39</b>  | <b>c.1789G&gt;T</b><br>(13)<br><b>c.2497_2498delCA</b>     | <b>p.Glu597*</b><br>(h)<br><b>p.Gln833Valfs*6</b>                                                          | 13 (het)<br>18                 | No                     | IDA defects with microtubular disorganization<br>-21: +SI |

|                                                   |                        |                |                                               |                                         |                            |     |                                                              |
|---------------------------------------------------|------------------------|----------------|-----------------------------------------------|-----------------------------------------|----------------------------|-----|--------------------------------------------------------------|
|                                                   |                        |                | (18)                                          | (h)                                     | (het)                      |     |                                                              |
| <b>A4220 (#337)</b><br>-21 (#1310)<br>-22 (#1311) | Caucasian              | <b>CCDC40</b>  | c.248delC                                     | p.Ala83Valfs*84                         | 3<br>(Hom)                 | No  | IDA defects with<br>microtubular disorganization<br>-22: +SI |
| <b>A4216 (#250)</b><br>-21 (#1166)<br>-22 (#1167) | South Asian            | <b>CCDC40</b>  | <b>c.1416delG</b>                             | <b>p.Ile473Phefs*2</b>                  | 9<br>(Hom)                 | Yes | IDA defects with<br>microtubular disorganization             |
| <b>A4208 (#130)</b><br>-21 (#818)<br>-23 (#820)   | Caucasian              | <b>CCDC40</b>  | c.2441G>A                                     | p.Arg814*                               | 14<br>(Hom)                | Yes | IDA defects with<br>microtubular disorganization<br>-21: +SI |
| <b>A4224 (#394)</b><br>-21 (#1439)<br>-22 (#1670) | Caucasian/<br>Hispanic | <b>DNAH11</b>  | <b>c.2491C&gt;T</b><br><b>c.3871G&gt;A</b>    | <b>p.Gln831*</b><br><b>p.Ala1291Thr</b> | 14<br>(het)<br>21<br>(het) | No  | Normal DA+CA<br>-22: SI                                      |
| <b>A4230 (#560)</b><br>-22 (#1737)<br>-23 (#1736) | Caucasian              | <b>DNAH11</b>  | <b>c.4438C&gt;T</b><br><b>c.8698C&gt;T</b>    | p.Arg1480*<br><b>p.Arg2907*</b>         | 25<br>(het)<br>54<br>(het) | No  | Normal DA+CA<br>-23: +SI                                     |
| <b>A4218 (#268)</b><br>-21 (#1192)<br>-23 (#1193) | Caucasian              | <b>DNAI2</b>   | <b>c.1304G&gt;A</b><br><b>c.1357_1358insG</b> | p.Trp435*<br><b>p.Glu453Glyfs*40</b>    | 10<br>(het)<br>11<br>(het) | No  | ODA defect                                                   |
| <b>A4217 (#264)</b><br>-21 (#1186)                | South Asian            | <b>CCDC103</b> | c.461A>C                                      | p.His154Pro                             | 4<br>(Hom)                 | Yes | possible ODA defects                                         |

#### Heterozygous only mutations in known genes associated with PCD

|                                                        |           |              |                       |                                                          |                    |    |                                    |
|--------------------------------------------------------|-----------|--------------|-----------------------|----------------------------------------------------------|--------------------|----|------------------------------------|
| <b>A4228 (#530-1674)</b><br>-21 (#9115)<br>-22 (#9116) | Caucasian | <b>DNAH5</b> | <b>c.4237C&gt;T</b>   | <b>p.Gln1413*</b>                                        | 27<br>(het)        | No | ODA defect<br>-22: SA              |
| <b>A4198 (#9)</b><br>-21 (#62)<br>-22 (#63)            | Caucasian | <b>DNAH5</b> | c.5647C>T             | p.Arg1883*                                               | 34<br>(het)        | No | ODA defect<br>-21: +SI<br>-22: +SA |
| <b>A4221 (#348)</b><br>-21 (#1332)<br>-22 (#1442)      | Caucasian | <b>DNAH5</b> | <b>c.8449-2A&gt;G</b> | <b>p.(?)</b><br>(100% conserved splice acceptor<br>site) | Intron 50<br>(het) | No | ODA defect<br>-21:SI               |

ODA, outer dynein arm; IDA, inner dynein arm; SI, *situs inversus*; SA, *situs ambiguous*; DA, dynein arm; CA, central apparatus

<sup>a</sup>Individual with exome capture data is underlined in first column.

**GenBank accession numbers.** The following GenBank accession numbers were used for annotation of recessive mutations: *DNAH5*: NM\_001369.2, *CCDC39*: NM\_181426.1, *CCDC40*: NM\_017950.3, *DNAH11*: NM\_003777.3, *DNAI2*: NM\_023036.4, *CCDC103*: NM\_213607.2.

Mutations which are not reported in HGMD<sup>®</sup> Gene Mutation Database are shown in bold.

**Table S2. Biallelic Mutations of *LRRC6* in 13 Families with Primary Ciliary Dyskinesia**

| Family Individual                                 | Ethnic origin   | Nucleotide alteration <sup>a,b</sup> (segregation) | Deduced protein Change        | Exon/ Intron (Zygotity)  | AA sequence conservation <sup>c</sup> | Parental consanguinity | IF (axonemal ODA/IDA protein localization)      | TEM                | Video-Microscopy  | Other (clinical features)                                                           |
|---------------------------------------------------|-----------------|----------------------------------------------------|-------------------------------|--------------------------|---------------------------------------|------------------------|-------------------------------------------------|--------------------|-------------------|-------------------------------------------------------------------------------------|
| <b>OI-8</b><br>-II1<br>-II2                       | Israeli         | c.169_173delinsTC<br>CCAAT<br>(-11: het, -12: ND)  | p.Gly57Serfs*3                | 2<br>(Hom)               | N/A                                   | Yes                    | <b>DNAH5</b> : defect<br><b>DNALI1</b> : defect | ODA+IDA<br>defects | immotile<br>cilia | -21/-22: SI, recur.<br>sinusitis/pneumonia<br>, BE                                  |
| <b>OP-841</b>                                     | Danish          | c.259T>C<br><br>c.436G>C                           | p.Cys87Arg<br><br>p.Asp146His | 4<br>(het)<br>5<br>(het) | Drosophila<br><br>Drosophila          | No                     | <b>DNAH5</b> : defect<br><b>DNALI1</b> : defect | ODA+IDA<br>defects | immotile<br>cilia | SS, BE                                                                              |
| <b>OP-1183</b>                                    | Turkish         | c.562C>T                                           | p.Gln188*                     | 5<br>(Hom)               | N/A                                   | ND                     | <b>DNAH5</b> : defect<br><b>DNALI1</b> : defect | ODA+IDA<br>defects | immotile<br>cilia | SI, BE, recur.<br>bronchitis/rhinitis,<br>infertility                               |
| <b>OP-228</b><br>-II2                             | German          | c.598_599delAA<br>(-11: het, -12: het)             | p.Lys200Glufs*3               | 5<br>(Hom)               | N/A                                   | Yes                    | <b>DNAH5</b> : defect<br><b>DNALI1</b> : defect | -                  | immotile<br>cilia | SI, recur. otitis media<br>/pneumonia, PRDS                                         |
| <b>A4213 (#232)</b><br>-21 (#1143)<br>-22 (#1144) | Asian-Pakistani | <b>c.630delG</b><br>(-11: ND, -12: het)            | p.Trp210Cysfs*12              | 5<br>(Hom)               | N/A                                   | Yes                    | ND                                              | ODA+IDA<br>defects | ND                | -21: SI                                                                             |
| <b>#30</b><br>-21 (#204)                          | Asian-Pakistani | c.630delG<br>(-11: het, -12: het)                  | p.Trp210Cysfs*12              | 5<br>(Hom)               | N/A                                   | No                     | ND                                              | ODA+IDA<br>defects | immotile<br>cilia | SS                                                                                  |
| <b>#408</b><br>-21 (#1465)                        | Asian-Pakistani | c.630delG                                          | p.Trp210Cysfs*12              | 5<br>(Hom)               | N/A                                   | No                     | ND                                              | ODA+IDA<br>defects | ND                | SI                                                                                  |
| <b>#762</b><br>-21 (#2190)                        | Asian-Pakistani | c.630delG                                          | p.Trp210Cysfs*12              | 5<br>(Hom)               | N/A                                   | No                     | ND                                              | ODA+IDA<br>defects | ND                | SI<br>+multiple<br>pancreas                                                         |
| <b>Fam9</b><br>-25, -26, -27                      | Asian-Pakistani | c.630delG<br>(-11: het, -12: het)                  | p.Trp210Cysfs*12              | 5<br>(Hom)               | N/A                                   | Yes                    | ND                                              | ODA+IDA<br>defects | -                 | SS                                                                                  |
| <b>Fam21</b><br>-22, -23                          | Asian-Pakistani | c.630delG<br>(-11: het, -12: het)                  | p.Trp210Cysfs*12              | 5<br>(Hom)               | N/A                                   | Yes                    | ND                                              | ODA+IDA<br>defects | -                 | SS                                                                                  |
| <b>OP-106</b>                                     | Turkish         | c.653+1G>A                                         | oblig. 5' splice site         | 5<br>(Hom)               | N/A                                   | Yes                    | ND                                              | ND                 | ND                | SA, PRDS                                                                            |
| <b>OP-709</b><br>-II2<br>-II1                     | Turkish         | c.710_711delCA<br>(-11: het, -12: het)             | p.Thr237Lysfs*7               | 6<br>(Hom)               | N/A                                   | Yes                    | <b>DNAH5</b> : defect<br><b>DNALI1</b> : defect | ND                 | ND                | -22/-21:SA/SS,<br>complex CHD, recur.<br>pneumonia/sinusitis<br>/otitis media, PRDS |
| <b>A5014_172 (#255)</b><br>-21 (#1173)            | Caucasian       | c.891delA                                          | p.Ala298Profs*2               | 7<br>(Hom)               | N/A                                   | No                     | ND                                              | ODA+IDA<br>defects | ND                | SS                                                                                  |

<sup>a</sup>The mutation in the index family is **bold**. Recurrent mutations are underlined. <sup>b</sup>cDNA mutations are numbered according to human cDNA reference sequence NM\_012472.3 (*LRRC6*), where +1 corresponds to the A of ATG start translation codon. <sup>c</sup>Amino acid (AA) residue is continually conserved throughout evolution as indicated.

BE, Bronchiectasis, CHD, congenital heart defect; het, heterozygous; Hom, homozygous; IDA, inner dynein arm; IF, immunofluorescence; N/A, not applicable; ND, no data; ODA, outer dynein arm; PRDS, postnatal respiratory distress syndrome, SA, *situs ambiguous*; SI, *situs inversus*; SS, *situs solitus*; TEM, transmission electron microscopy.



**Table S3. Primer/Morpholino Sequences for Zebrafish MO Knockdown**

| <b>Target</b>  | <b>Primer sequence (5'→3')</b>         | <b>Product size (bp)</b>  |
|----------------|----------------------------------------|---------------------------|
| <i>zmynd10</i> | <i>zmynd10</i> RTPCR F1                | GGTGGTTTCGCCAGCATGAATTT   |
| <i>zmynd10</i> | <i>zmynd10</i> RTPCR R1                | TCCAGATACAGAGCGTCCCACCA   |
| <i>zmynd10</i> | <i>zmynd10</i> RTPCR F2                | GCGCCAATCAGGAGGAATTCATTA  |
| <i>zmynd10</i> | <i>zmynd10</i> RTPCR R2                | CCAGCAGTGTGAGTTTGCGATGA   |
| <i>zmynd10</i> | <i>zmynd10</i> ATG MO                  | ACTGAATCCATCGCTTCAGAATGTT |
| <i>zmynd10</i> | <i>zmynd10</i> e3i3 splice junction MO | TAAGCTGAGTCTGCTCACCACCATG |

F, forward; R, reverse.

**Table S4. Detailed Demographic and Clinical Phenotype in PCD Patients Tested for *LRRC6***

| Clinical observation                  |                     | PCD patients with ODA+IDA defect tested for <i>LRRC6</i> |                                                         |
|---------------------------------------|---------------------|----------------------------------------------------------|---------------------------------------------------------|
|                                       |                     | Full gene by Sanger sequencing*                          | Restriction digestion for 630delG mutation <sup>§</sup> |
| <b>Subjects</b>                       | Total # of patients | 4 (100%)                                                 | 36 (100%)                                               |
| <b>Gender</b>                         | Male                | 2 (50%)                                                  | 18 (50%)                                                |
|                                       | Female              | 2 (50%)                                                  | 18 (50%)                                                |
| <b>Age Range</b>                      |                     | 27 - 48 years                                            | 3 months - 68 years                                     |
| <b>Parental consanguinity</b>         |                     | 1 (25%)                                                  | 4 (11%)                                                 |
| <b>Ethnicity</b>                      | Caucasian           | 2 (50%)                                                  | 25 (69%)                                                |
|                                       | Non-Caucasian       | 2 (50%) <sup>†</sup>                                     | 11 (31%) <sup>‡</sup>                                   |
| <b>Situs status</b>                   | Situs inversus      | 1 (25%)                                                  | 18 (50%)                                                |
|                                       | Situs ambiguus      | 0                                                        | 4 (11%)                                                 |
|                                       | Situs solitus       | 3 (75%)                                                  | 14 (39%)                                                |
| <b>Neonatal RDS<sup>  </sup></b>      | Yes                 | 3 (100%)                                                 | 30 (83%)                                                |
|                                       | No                  | 0                                                        | 6 (17%)                                                 |
| <b>Bronchiectasis<sup>  </sup></b>    | Yes                 | 4 (100%)                                                 | 19 (66%)                                                |
|                                       | No                  | 0                                                        | 10 (34%)                                                |
| <b>Sinusitis<sup>  </sup></b>         | Yes                 | 4 (100%)                                                 | 22 (63%)                                                |
|                                       | No                  | 0                                                        | 13 (37%)                                                |
| <b>Otitis Media<sup>  </sup></b>      | Yes                 | 2 (50%)                                                  | 28 (78%)                                                |
|                                       | No                  | 2 (50%)                                                  | 8 (22%)                                                 |
| <b>Nasal NO (nl/min)<sup>  </sup></b> | Mean±SD             | 22.0±17.53 <sup>††</sup>                                 | 16.88±13.25 <sup>††</sup>                               |
|                                       | (# of subjects)     | 4 (100%)                                                 | 28 (78%)                                                |

\* All coding exons and splice junction were interrogated.

§ c.630delG (p.W210CfsX11) creates a BsrG1 restriction site that was used to interrogate patients.

† Included 1 Asian and 1 Brazilian ethnicity.

‡ Included 7 Asian, 1 African American, 2 Hispanic, and 1 mixed Caucasian/American Indian Alaskan ethnicity.

|| Incomplete information on some of the patients.

†† Normal nasal NO levels, calculated from 27 healthy subjects 376±124nl/min (mean±SD) {Ref:listed as MZ6}.

**Abbreviations:**

ODA+IDA = Outer+inner dynein arms, NO = Nitric Oxide, SD = Standard Deviation
